# Supplementary material for: Continued occurrence of serotype 1 pneumococcal meningitis in two regions located in the meningitis belt in Ghana five years after introduction of 13-valent pneumococcal conjugate vaccine
Source: PLoS One. 2018 Sep 7;13(9):e0203205. doi: 10.1371/journal.pone.0203205 (PMC6128537; doi:10.1371/journal.pone.0203205)
Supplement: S1 Dataset — (XLSX) [file pone.0203205.s001.xlsx]

## Sheet: Case-based data
Year	Epi Week	Region	Sex	Age group	Outcome	Pneumovac	Latex	Culture	PCR	Etiology	PCR_SpSerotype
2016	1	NOR	F	5-14	Alive		SPN	Missing/Not done	SPN	SPN	1
2016	1	UWR	F	5-14	Unknown		Missing/Not done	Missing/Not done	SPN	SPN	1
2017	8	NOR	F	<5	Alive	1-Yes-1 dose	StrepB	Missing/Not done	NEGATIVE	StrepB
2016	1	NOR	F	30-59	Dead		Missing/Not done	Missing/Not done	HI,SPN	HI,SPN
2016	1	UWR	M	15-29	Unknown		Missing/Not done	Missing/Not done	NM	NM
2016	1	UWR	F	15-29	Alive		Missing/Not done	Missing/Not done	NM	NM
2016	1	UWR	M	15-29	Unknown		Missing/Not done	Missing/Not done	NM	NM
2016	1	UWR	M	30-59	Alive		Missing/Not done	Missing/Not done	NM	NM
2016	1	UWR	M	5-14	Alive		Missing/Not done	SPN	NM	NM
2016	1	UWR	F	60+	Alive		Missing/Not done	Negative	NM	NM
2016	1	UWR	M	60+	Unknown		Missing/Not done	Missing/Not done	NM	NM
2016	1	NOR	M	5-14	Alive		Negative	Negative	NM,SPN	NM,SPN
2016	1	NOR	M	15-29	Alive		Negative	Missing/Not done	NEGATIVE
2016	1	UWR	F	15-29	Unknown		Missing/Not done	Missing/Not done	NEGATIVE
2016	1	NOR	F	5-14	Alive		Missing/Not done	Missing/Not done	NEGATIVE
2016	1	NOR	F	5-14	Alive		Negative	Negative	NEGATIVE
2016	1	UWR	M	5-14	Unknown		Missing/Not done	Missing/Not done	NEGATIVE
2017	8	NOR	M	<5	Alive	2-Yes-2 doses	StrepB	Missing/Not done	NEGATIVE	StrepB
2017	4	UWR	M	<5	Unknown	3-Yes-3 doses	Missing/Not done	Missing/Not done	NEGATIVE
2017	8	NOR	M	<5	Alive	3-Yes-3 doses	Missing/Not done	Missing/Not done	NEGATIVE
2017	9	NOR	M	<5	Alive	3-Yes-3 doses	Negative	Missing/Not done	NEGATIVE
2017	9	NOR	M	<5	Unknown	3-Yes-3 doses	Negative	Missing/Not done	NEGATIVE
2017	1	UWR	M	30-59	Dead		Missing/Not done	Missing/Not done	SPN	SPN	12F/12A/12B/44/46
2017	1	NOR	M	30-59	Alive		Missing/Not done	Missing/Not done	SPN	SPN	1
2017	1	UWR	M	5-14	Alive	9-Unknown	Missing/Not done	Missing/Not done	SPN	SPN	1
2017	1	UWR	F	15-29	Alive	9-Unknown	Negative	Missing/Not done	SPN	SPN	1
2017	1	NOR	M	30-59	Alive		Negative	Missing/Not done	SPN	SPN	1
2017	1	NOR	F	5-14	Alive		Missing/Not done	Missing/Not done	NM	NM
2017	1	UWR	M	15-29	Alive	9-Unknown	Missing/Not done	Missing/Not done	NEGATIVE
2017	1	UWR	M	30-59	Alive		Missing/Not done	Missing/Not done	NEGATIVE
2017	1	UWR	M	60+	Alive		Missing/Not done	Missing/Not done	NEGATIVE
2017	1	UWR	M	60+	Alive	9-Unknown	Negative	Missing/Not done	NEGATIVE
2017	11	NOR	M	<5	Dead	3-Yes-3 doses	Negative	Missing/Not done	HI,SPN	HI,SPN
2016	2	NOR	F	5-14	Unknown		Negative	Negative	NM	NM
2016	2	UWR	F	30-59	Unknown		Missing/Not done	Missing/Not done	NM	NM
2016	2	NOR	M	5-14	Alive		NmW/Y	Missing/Not done	NM	NM
2016	2	UWR	M	30-59	Unknown		Missing/Not done	Missing/Not done	NM,SPN	NM,SPN
2016	2	UWR	F	15-29	Alive		NmA	Missing/Not done	NEGATIVE	NmA
2016	2	NOR	F	60+	Alive		Negative	Missing/Not done	SPN-Equivocal
2016	2	UWR	F	30-59	Alive		Missing/Not done	Missing/Not done	NM-Equivocal
2016	2	UWR	F	60+	Unknown		Missing/Not done	Missing/Not done	NEGATIVE
2016	2	NOR	M	15-29	Alive		Negative	Missing/Not done	NEGATIVE
2016	2	NOR	M	30-59	Alive		Negative	Negative	NEGATIVE
2016	2	UWR	M	30-59	Alive		Missing/Not done	Negative	NEGATIVE
2016	2	UWR	F	30-59	Alive		Missing/Not done	Missing/Not done	NEGATIVE
2016	2	UWR	F	5-14	Unknown		Missing/Not done	Missing/Not done	NEGATIVE
2016	2	UWR	M	60+	Unknown		Missing/Not done	Missing/Not done	NEGATIVE
2017	2	UWR	M	15-29	Dead	9-Unknown	SPN	SPN	SPN	SPN	12F/12A/12B/44/46
2017	2	UWR	F	5-14	Dead		Missing/Not done	Missing/Not done	SPN	SPN	12F/12A/12B/44/46
2017	2	UWR	F	5-14	Dead		Missing/Not done	Missing/Not done	SPN	SPN	12F/12A/12B/44/46
2017	2	UWR	M	30-59	Alive	9-Unknown	Missing/Not done	Missing/Not done	SPN	SPN	Negative by PCR
2017	2	UWR	F	30-59	Dead		Missing/Not done	Missing/Not done	SPN	SPN	Negative by PCR
2017	2	UWR	M	60+	Dead	9-Unknown	SPN	SPN	SPN	SPN	1
2017	2	UWR	M	30-59	Dead		Missing/Not done	Missing/Not done	SPN	SPN	1
2017	2	UWR	F	15-29	Dead		Missing/Not done	Missing/Not done	NEGATIVE
2017	2	UWR	M	15-29	Dead		Missing/Not done	Missing/Not done	NEGATIVE
2017	2	UWR	M	15-29	Unknown		Missing/Not done	Missing/Not done	NEGATIVE
2017	2	NOR	M	30-59	Alive		Missing/Not done	Negative	NEGATIVE
2017	2	UWR	M	30-59	Dead		Missing/Not done	Missing/Not done	NEGATIVE
2017	2	UWR	M	5-14	Dead		Missing/Not done	Missing/Not done	NEGATIVE
2017	2	UWR	M	60+	Dead	9-Unknown	Negative	Negative	NEGATIVE
2017	2	UWR	F	60+	Unknown		Missing/Not done	Missing/Not done	NEGATIVE
2016	3	NOR	M	15-29	Dead		SPN	Missing/Not done	SPN	SPN	1
2016	3	NOR	F	30-59	Alive		SPN	Missing/Not done	SPN	SPN	1
2016	3	UWR	F	30-59	Dead		Missing/Not done	Missing/Not done	SPN	SPN	1
2016	3	NOR	M	5-14	Unknown		SPN	Negative	SPN	SPN	1
2016	3	UWR	F	5-14	Alive		Missing/Not done	Missing/Not done	SPN	SPN	1
2016	3	UWR	F	5-14	Dead		Missing/Not done	Missing/Not done	SPN	SPN	1
2016	3	UWR	M	15-29	Alive		Missing/Not done	Negative	SPN	SPN	18C/B/A/F
2016	3	UWR	M	15-29	Alive		Missing/Not done	Negative	SPN	SPN	18C/B/A/F
2016	3	UWR	M	30-59	Alive		Missing/Not done	Missing/Not done	SPN	SPN	6A/6B
2016	3	UWR	F	5-14	Alive		NmW/Y,SPN	Missing/Not done	HI	HI
2016	3	NOR	M	15-29	Alive		Missing/Not done	Missing/Not done	NM	NM
2016	3	UWR	M	15-29	Alive		Missing/Not done	NM	NM	NM
2016	3	UWR	M	15-29	Alive		Missing/Not done	Negative	NM	NM
2016	3	UWR	M	15-29	Alive		Negative	Negative	NM	NM
2016	3	UWR	M	30-59	Alive		Missing/Not done	Negative	NM	NM
2016	3	NOR	M	5-14	Alive		NmW/Y	Missing/Not done	NM	NM
2016	3	NOR	F	5-14	Alive		NmW/Y	Missing/Not done	NM	NM
2016	3	NOR	M	5-14	Alive		Missing/Not done	Missing/Not done	NM	NM
2016	3	UWR	F	5-14	Alive		Missing/Not done	Negative	NM	NM
2016	3	NOR	F	60+	Dead		Missing/Not done	Missing/Not done	NM	NM
2016	3	NOR	F	15-29	Alive		Negative	Missing/Not done	SPN	SPN	Missing sample for typing
2016	3	UWR	M	15-29	Alive		Missing/Not done	SPN	NEGATIVE	SPN
2016	3	UWR	F	30-59	Alive		Missing/Not done	SPN	NEGATIVE	SPN
2016	3	UWR	F	30-59	Alive		Missing/Not done	Negative	NM-Equivocal
2016	3	NOR	M	15-29	Alive		Negative	Missing/Not done	NEGATIVE
2016	3	NOR	M	15-29	Alive		Missing/Not done	Missing/Not done	NEGATIVE
2016	3	NOR	F	15-29	Alive		Negative	Missing/Not done	NEGATIVE
2016	3	NOR	F	15-29	Alive		Negative	Missing/Not done	NEGATIVE
2016	3	NOR	M	15-29	Alive		Negative	Missing/Not done	NEGATIVE
2016	3	NOR	M	15-29	Alive		Negative	Missing/Not done	NEGATIVE
2016	3	NOR	F	15-29	Alive		Negative	Missing/Not done	NEGATIVE
2016	3	UWR	M	15-29	Alive		Missing/Not done	Negative	NEGATIVE
2016	3	UWR	M	15-29	Alive		Missing/Not done	Missing/Not done	NEGATIVE
2016	3	UWR	F	15-29	Unknown		Missing/Not done	Missing/Not done	NEGATIVE
2016	3	UWR	F	30-59	Alive		Missing/Not done	Missing/Not done	NEGATIVE
2016	3	UWR	F	30-59	Unknown		Missing/Not done	Missing/Not done	NEGATIVE
2016	3	UWR	M	30-59	Alive		Missing/Not done	Missing/Not done	NEGATIVE
2016	3	NOR	M	5-14	Alive		Negative	Missing/Not done	NEGATIVE
2016	3	UWR	M	5-14	Alive		Missing/Not done	Negative	NEGATIVE
2016	3	UWR	M	5-14	Alive		Missing/Not done	Negative	NEGATIVE
2016	3	UWR	F	60+	Alive		Missing/Not done	Missing/Not done	NEGATIVE
2016	3	UWR	F	60+	Dead		Missing/Not done	Negative	NEGATIVE
2017	3	UWR	M	<5	Unknown	9-Unknown	Missing/Not done	Missing/Not done	NEGATIVE
2017	4	UWR	F	<5	Unknown	9-Unknown	Negative	Negative	NEGATIVE
2017	5	UWR	F	<5	Unknown	9-Unknown	Missing/Not done	Missing/Not done	NEGATIVE
2017	3	UWR	F	15-29	Unknown		Missing/Not done	Missing/Not done	SPN	SPN	Negative by PCR
2017	3	UWR	M	30-59	Unknown		Missing/Not done	Missing/Not done	SPN	SPN	Negative by PCR
2017	3	UWR	M	30-59	Alive		Missing/Not done	Missing/Not done	SPN	SPN	Negative by PCR
2017	3	UWR	F	15-29	Alive	9-Unknown	Missing/Not done	Missing/Not done	SPN	SPN	1
2017	3	NOR	F	15-29	Alive	9-Unknown	Missing/Not done	Missing/Not done	NM	NM
2017	3	NOR	M	5-14	Unknown	9-Unknown	NmW/Y	Missing/Not done	NM	NM
2017	3	NOR	M	5-14	Unknown	3-Yes-3 doses	NmW/Y	Missing/Not done	NM	NM
2017	3	UWR	M	5-14	Alive	9-Unknown	Missing/Not done	Missing/Not done	NM	NM
2017	3	NOR	M	15-29	Unknown		Missing/Not done	Missing/Not done	NEGATIVE
2017	3	UWR	M	15-29	Alive	9-Unknown	Negative	Negative	NEGATIVE
2017	3	UWR	M	15-29	Unknown		Missing/Not done	Missing/Not done	NEGATIVE
2017	3	UWR	M	30-59	Dead	9-Unknown	Negative	Missing/Not done	NEGATIVE
2017	3	UWR	M	30-59	Alive		Missing/Not done	Missing/Not done	NEGATIVE
2017	3	UWR	F	30-59	Unknown	9-Unknown	Negative	Negative	NEGATIVE
2017	3	UWR	F	5-14	Alive	9-Unknown	Negative	Negative	NEGATIVE
2017	3	UWR	M	5-14	Alive		Missing/Not done	Missing/Not done	NEGATIVE
2017	3	UWR	F	5-14	Alive		Missing/Not done	Missing/Not done	NEGATIVE
2017	3	UWR	M	5-14	Dead	9-Unknown	Missing/Not done	Missing/Not done	NEGATIVE
2017	3	UWR	M	60+	Alive		Missing/Not done	Missing/Not done	NEGATIVE
2017	3	UWR	M	60+	Unknown		Negative	Missing/Not done	NEGATIVE
2017	6	NOR	M	<5	Unknown	9-Unknown	SPN	Missing/Not done	SPN	SPN	1
2017	6	NOR	M	<5	Alive	9-Unknown	Negative	Negative	NEGATIVE
2016	4	NOR	F	15-29	Unknown		SPN	Missing/Not done	SPN	SPN	1
2016	4	NOR	M	30-59	Unknown		Missing/Not done	Missing/Not done	SPN	SPN	1
2016	4	NOR	M	5-14	Unknown		Missing/Not done	Negative	SPN	SPN	1
2016	4	UWR	M	15-29	Dead		Missing/Not done	Missing/Not done	SPN	SPN	1
2016	4	UWR	M	15-29	Alive		Negative	Negative	SPN	SPN	5
2016	4	NOR	F	15-29	Alive		Missing/Not done	Missing/Not done	SPN	SPN	14
2016	4	NOR	F	15-29	Unknown		Missing/Not done	Missing/Not done	SPN	SPN	19A
2016	4	NOR	F	15-29	Alive		Negative	Missing/Not done	NM	NM
2016	4	UWR	M	15-29	Alive		Missing/Not done	Missing/Not done	NM	NM
2016	4	NOR	F	5-14	Alive		NmW/Y	Missing/Not done	NM	NM
2016	4	NOR	M	5-14	Alive		Missing/Not done	Missing/Not done	NM	NM
2016	4	NOR	F	5-14	Alive		Missing/Not done	Missing/Not done	NM	NM
2016	4	UWR	F	5-14	Alive		Missing/Not done	Missing/Not done	NM	NM
2016	4	UWR	F	5-14	Alive		Missing/Not done	Missing/Not done	NM	NM
2016	4	UWR	F	5-14	Alive		Missing/Not done	Missing/Not done	NM	NM
2017	7	NOR	M	<5	Alive	9-Unknown	HIb	Missing/Not done	HI	HI
2016	4	NOR	F	5-14	Alive		NmW/Y	Missing/Not done	NEGATIVE	NmW/Y
2016	4	NOR	F	15-29	Unknown		Negative	Missing/Not done	SPN	SPN
2016	4	NOR	M	15-29	Alive		SPN	Missing/Not done	NEGATIVE	SPN
2016	4	UWR	M	15-29	Alive		Missing/Not done	SPN	NEGATIVE	SPN
2016	4	UWR	F	15-29	Dead		SPN	SPN	NEGATIVE	SPN
2016	4	UWR	F	30-59	Alive		Missing/Not done	SPN	NEGATIVE	SPN
2016	4	UWR	F	30-59	Dead		SPN	Missing/Not done	NEGATIVE	SPN
2016	4	NOR	M	15-29	Alive		Negative	Missing/Not done	NEGATIVE
2016	4	NOR	M	15-29	Alive		Negative	Missing/Not done	NEGATIVE
2016	4	NOR	M	15-29	Alive		Negative	Missing/Not done	NEGATIVE
2016	4	NOR	F	15-29	Alive		Negative	Missing/Not done	NEGATIVE
2016	4	NOR	F	15-29	Alive		Missing/Not done	Missing/Not done	NEGATIVE
2016	4	NOR	M	15-29	Alive		Negative	Missing/Not done	NEGATIVE
2016	4	NOR	F	15-29	Alive		Missing/Not done	Missing/Not done	NEGATIVE
2016	4	UWR	M	15-29	Alive		Missing/Not done	Missing/Not done	NEGATIVE
2016	4	UWR	M	15-29	Alive		Negative	Negative	NEGATIVE
2016	4	UWR	F	15-29	Alive		Negative	Missing/Not done	NEGATIVE
2016	4	UWR	M	15-29	Alive		Missing/Not done	Missing/Not done	NEGATIVE
2016	4	UWR	M	30-59	Alive		Missing/Not done	Missing/Not done	NEGATIVE
2016	4	UWR	M	30-59	Alive		Negative	Negative	NEGATIVE
2016	4	NOR	M	5-14	Alive		Negative	Missing/Not done	NEGATIVE
2016	4	UWR	F	5-14	Alive		Negative	Missing/Not done	NEGATIVE
2017	7	NOR	F	<5	Alive	9-Unknown	Negative	Missing/Not done	NEGATIVE
2017	7	NOR	M	<5	Unknown	9-Unknown	Missing/Not done	Missing/Not done	NEGATIVE
2017	7	UWR	M	<5	Unknown	9-Unknown	Missing/Not done	Negative	NEGATIVE
2017	7	UWR	M	<5	Alive	9-Unknown	Negative	Missing/Not done	NEGATIVE
2017	4	UWR	M	30-59	Alive	9-Unknown	Negative	Negative	SPN	SPN	Negative by PCR
2017	4	UWR	F	30-59	Unknown	9-Unknown	SPN	SPN	SPN	SPN	1
2017	4	UWR	F	30-59	Alive	9-Unknown	Missing/Not done	Missing/Not done	SPN	SPN	1
2017	4	UWR	M	30-59	Unknown	9-Unknown	SPN	Negative	SPN	SPN	1
2017	4	NOR	M	5-14	Unknown	4-No	NmW/Y	Missing/Not done	NM	NM
2017	4	UWR	F	15-29	Alive		Missing/Not done	Missing/Not done	NEGATIVE
2017	4	UWR	F	30-59	Unknown	9-Unknown	Negative	Missing/Not done	NEGATIVE
2017	4	UWR	F	30-59	Alive	9-Unknown	Missing/Not done	Missing/Not done	NEGATIVE
2017	4	UWR	F	30-59	Unknown	9-Unknown	Missing/Not done	Negative	NEGATIVE
2017	4	UWR	F	30-59	Alive		Missing/Not done	Missing/Not done	NEGATIVE
2017	4	UWR	F	30-59	Alive		Missing/Not done	Missing/Not done	NEGATIVE
2017	4	UWR	M	30-59	Dead	9-Unknown	Missing/Not done	Missing/Not done	NEGATIVE
2017	4	UWR	F	5-14	Alive	9-Unknown	Negative	Negative	NEGATIVE
2017	4	UWR	F	5-14	Unknown	9-Unknown	Negative	Negative	NEGATIVE
2017	4	UWR	F	5-14	Unknown	9-Unknown	Missing/Not done	Negative	NEGATIVE
2017	4	UWR	M	5-14	Alive	9-Unknown	Negative	Missing/Not done	NEGATIVE
2017	4	UWR	M	5-14	Alive	9-Unknown	Missing/Not done	Negative	NEGATIVE
2017	4	UWR	M	5-14	Alive		Missing/Not done	Missing/Not done	NEGATIVE
2017	4	UWR	M	60+	Unknown	9-Unknown	Negative	Negative	NEGATIVE
2017	7	UWR	M	<5	Alive	9-Unknown	Missing/Not done	Negative	NEGATIVE
2017	7	UWR	F	<5	Alive	9-Unknown	Missing/Not done	Negative	NEGATIVE
2016	5	NOR	F	15-29	Alive		Missing/Not done	Missing/Not done	SPN	SPN	1
2016	5	NOR	F	15-29	Unknown		Missing/Not done	Missing/Not done	SPN	SPN	1
2016	5	UWR	M	30-59	Alive		Missing/Not done	Negative	SPN	SPN	1
2016	5	UWR	F	60+	Dead		Missing/Not done	Missing/Not done	SPN	SPN	1
2016	5	UWR	F	30-59	Alive		Missing/Not done	SPN	SPN	SPN	1
2016	5	UWR	M	15-29	Alive		Missing/Not done	Missing/Not done	SPN	SPN	1
2016	5	UWR	M	5-14	Alive		Missing/Not done	Missing/Not done	SPN	SPN	23F
2016	5	UWR	M	30-59	Alive		Missing/Not done	Negative	HI,SPN	HI,SPN
2016	5	NOR	M	15-29	Unknown		Missing/Not done	Missing/Not done	NM	NM
2016	5	NOR	M	15-29	Unknown		Missing/Not done	Missing/Not done	NM	NM
2016	5	UWR	F	15-29	Alive		Missing/Not done	Missing/Not done	NM	NM
2016	5	UWR	F	15-29	Alive		Missing/Not done	Missing/Not done	NM	NM
2016	5	UWR	F	15-29	Alive		Missing/Not done	Negative	NM	NM
2016	5	UWR	F	15-29	Alive		Missing/Not done	NM	NM	NM
2016	5	NOR	F	30-59	Alive		Negative	Missing/Not done	NM	NM
2016	5	NOR	M	30-59	Alive		Missing/Not done	Missing/Not done	NM	NM
2016	5	UWR	F	30-59	Alive		Missing/Not done	Missing/Not done	NM	NM
2016	5	NOR	M	5-14	Alive		Missing/Not done	Missing/Not done	NM	NM
2016	5	UWR	F	5-14	Alive		Missing/Not done	Missing/Not done	NM	NM
2016	5	UWR	M	5-14	Alive		Missing/Not done	NM	NM	NM
2016	5	UWR	M	5-14	Alive		Missing/Not done	Missing/Not done	NM	NM
2016	5	UWR	M	5-14	Alive		Missing/Not done	Missing/Not done	NM	NM
2016	5	UWR	M	5-14	Alive		Missing/Not done	NM	NM	NM
2016	5	UWR	M	60+	Alive		Missing/Not done	Negative	NM	NM
2016	5	UWR	F	60+	Dead		Missing/Not done	Missing/Not done	NM	NM
2017	8	NOR	M	<5	Alive	9-Unknown	Missing/Not done	Missing/Not done	NM	NM
2017	8	NOR	M	<5	Unknown	9-Unknown	StrepB	Missing/Not done	NEGATIVE	StrepB
2017	8	NOR	F	<5	Alive	9-Unknown	StrepB	Missing/Not done	NEGATIVE	StrepB
2017	8	NOR	M	<5	Unknown	9-Unknown	Missing/Not done	Missing/Not done	NEGATIVE
2016	5	UWR	F	60+	Alive		Missing/Not done	NM	NEGATIVE	NM
2017	8	UWR	F	<5	Alive	9-Unknown	Missing/Not done	Negative	NEGATIVE
2016	5	NOR	M	15-29	Unknown		Missing/Not done	Missing/Not done	NM,SPN	NM,SPN
2016	5	UWR	F	30-59	Alive		Missing/Not done	Missing/Not done	SPN	SPN
2016	5	UWR	F	30-59	Alive		Missing/Not done	NM	SPN-Equivocal
2016	5	NOR	M	15-29	Alive		Missing/Not done	Missing/Not done	NEGATIVE
2016	5	UWR	M	15-29	Alive		Missing/Not done	Missing/Not done	NEGATIVE
2016	5	UWR	M	15-29	Alive		Missing/Not done	Missing/Not done	NEGATIVE
2016	5	UWR	M	15-29	Alive		Missing/Not done	Missing/Not done	NEGATIVE
2016	5	UWR	F	15-29	Alive		Missing/Not done	Missing/Not done	NEGATIVE
2016	5	UWR	M	15-29	Alive		Missing/Not done	Negative	NEGATIVE
2016	5	UWR	M	15-29	Alive		Missing/Not done	Negative	NEGATIVE
2016	5	UWR	F	30-59	Alive		Missing/Not done	Missing/Not done	NEGATIVE
2016	5	UWR	F	30-59	Alive		Missing/Not done	Negative	NEGATIVE
2016	5	UWR	F	5-14	Alive		Missing/Not done	Negative	NEGATIVE
2016	5	UWR	F	5-14	Alive		Missing/Not done	Missing/Not done	NEGATIVE
2016	5	UWR	F	5-14	Alive		Missing/Not done	Negative	NEGATIVE
2016	5	UWR	F	5-14	Alive		Missing/Not done	Missing/Not done	NEGATIVE
2016	5	UWR	M	5-14	Alive		Missing/Not done	Missing/Not done	NEGATIVE
2016	5	UWR	M	60+	Alive		Missing/Not done	Missing/Not done	NEGATIVE
2016	5	UWR	F	60+	Alive		Missing/Not done	Negative	NEGATIVE
2016	5	UWR	M	60+	Alive		Missing/Not done	Missing/Not done	NEGATIVE
2016	5	UWR	F	60+	Alive		Missing/Not done	Missing/Not done	NEGATIVE
2017	9	NOR	F	<5	Unknown	9-Unknown	Negative	Missing/Not done	NM	NM
2017	9	NOR	M	<5	Unknown	9-Unknown	Negative	Missing/Not done	NM	NM
2017	9	NOR	F	<5	Alive	9-Unknown	NmW/Y	Missing/Not done	NM	NM
2017	5	NOR	M	60+	Dead	9-Unknown	SPN	Missing/Not done	SPN	SPN	Negative by PCR
2017	5	UWR	M	15-29	Dead	9-Unknown	SPN	Missing/Not done	SPN	SPN	1
2017	5	UWR	F	5-14	Dead	9-Unknown	SPN	SPN	SPN	SPN	1
2017	5	NOR	M	15-29	Unknown	9-Unknown	Negative	Missing/Not done	SPN	SPN	1
2017	5	NOR	M	5-14	Unknown	9-Unknown	Missing/Not done	Missing/Not done	SPN	SPN	1
2017	5	NOR	F	15-29	Alive	9-Unknown	SPN	Missing/Not done	SPN	SPN	1
2017	5	UWR	F	15-29	Unknown	9-Unknown	Missing/Not done	Missing/Not done	SPN	SPN	1
2017	5	UWR	F	15-29	Alive	9-Unknown	Missing/Not done	Missing/Not done	NM	NM
2017	5	NOR	M	5-14	Alive	9-Unknown	StrepB	Negative	NM	NM
2017	5	UWR	M	5-14	Unknown	9-Unknown	Missing/Not done	Missing/Not done	NM	NM
2017	5	UWR	F	30-59	Unknown	9-Unknown	Missing/Not done	Missing/Not done	UNABLE TO MAKE CALL
2017	5	UWR	F	15-29	Unknown	9-Unknown	Missing/Not done	Missing/Not done	NEGATIVE
2017	5	UWR	M	15-29	Alive	9-Unknown	Missing/Not done	Missing/Not done	NEGATIVE
2017	5	UWR	F	15-29	Alive	9-Unknown	Missing/Not done	Missing/Not done	SPN-Equivocal
2017	5	UWR	F	15-29	Alive	9-Unknown	Missing/Not done	Missing/Not done	NEGATIVE
2017	5	UWR	F	15-29	Alive	4-No	Missing/Not done	Missing/Not done	NEGATIVE
2017	5	UWR	F	30-59	Alive	9-Unknown	Missing/Not done	Missing/Not done	NEGATIVE
2017	5	UWR	F	30-59	Unknown	9-Unknown	Missing/Not done	Negative	NEGATIVE
2017	5	UWR	M	30-59	Alive	9-Unknown	Negative	Missing/Not done	NEGATIVE
2017	5	NOR	F	5-14	Unknown	3-Yes-3 doses	Negative	Missing/Not done	NEGATIVE
2017	5	UWR	F	5-14	Alive	9-Unknown	Missing/Not done	Negative	NEGATIVE
2017	5	UWR	M	5-14	Alive	9-Unknown	Negative	Negative	NEGATIVE
2017	5	UWR	M	5-14	Alive	9-Unknown	Missing/Not done	Negative	NEGATIVE
2017	9	NOR	F	<5	Alive	9-Unknown	NmW/Y	Missing/Not done	NM	NM
2016	6	UWR	F	30-59	Alive		Missing/Not done	SPN	SPN	SPN	12F/12A/12B/44/46
2016	6	UWR	F	15-29	Alive		NmW/Y	Missing/Not done	SPN	SPN	Negative by PCR
2016	6	NOR	M	15-29	Dead		Missing/Not done	Missing/Not done	SPN	SPN	1
2016	6	UWR	M	30-59	Alive		Missing/Not done	Missing/Not done	SPN	SPN	1
2016	6	UWR	M	5-14	Alive		Missing/Not done	Missing/Not done	NM	NM
2016	6	UWR	F		Alive		Missing/Not done	Missing/Not done	NM	NM
2016	6	NOR	F	15-29	Alive		Missing/Not done	Missing/Not done	NM	NM
2016	6	NOR	F	15-29	Unknown		Missing/Not done	Missing/Not done	NM	NM
2016	6	UWR	M	15-29	Alive		Missing/Not done	Missing/Not done	NM	NM
2016	6	UWR	M	15-29	Alive		Missing/Not done	NM	NM	NM
2016	6	UWR	F	15-29	Alive		Missing/Not done	Missing/Not done	NM	NM
2016	6	NOR	F	30-59	Unknown		Missing/Not done	Missing/Not done	NM	NM
2016	6	NOR	M	30-59	Alive		Missing/Not done	Missing/Not done	NM	NM
2016	6	NOR	M	5-14	Alive		Missing/Not done	Missing/Not done	NM	NM
2016	6	NOR	M	5-14	Alive		Missing/Not done	Missing/Not done	NM	NM
2016	6	NOR	M	5-14	Alive		Missing/Not done	Missing/Not done	NM	NM
2016	6	NOR	M	5-14	Alive		Missing/Not done	Missing/Not done	NM	NM
2016	6	NOR	F	5-14	Unknown		Missing/Not done	Negative	NM	NM
2016	6	NOR	M	5-14	Alive		Missing/Not done	Missing/Not done	NM	NM
2016	6	NOR	M	5-14	Alive		Missing/Not done	Missing/Not done	NM	NM
2016	6	UWR	M	5-14	Unknown		Missing/Not done	Missing/Not done	NM	NM
2016	6	UWR	M	5-14	Alive		Missing/Not done	Missing/Not done	NM	NM
2016	6	UWR	M	5-14	Alive		Missing/Not done	Negative	NM	NM
2016	6	UWR	M	5-14	Alive		Missing/Not done	SPN	NM	NM
2016	6	UWR	F	60+	Alive		Missing/Not done	Missing/Not done	NM	NM
2016	6	UWR	M	60+	Alive		Missing/Not done	Missing/Not done	NM	NM
2017	9	NOR	F	<5	Unknown	9-Unknown	Missing/Not done	Missing/Not done	NEGATIVE
2017	10	NOR	F	<5	Alive	9-Unknown	NmW/Y	Missing/Not done	NM	NM
2016	6	UWR	F	15-29	Alive		Missing/Not done	Missing/Not done	NM,SPN	NM,SPN
2016	6	UWR	M	30-59	Alive		Missing/Not done	SPN	NEGATIVE	SPN
2016	6	UWR	M	5-14	Alive		Missing/Not done	SPN	NEGATIVE	SPN
2016	6	UWR	M	30-59	Alive		Missing/Not done	Missing/Not done	SPN-Equivocal
2016	6	UWR	F	15-29	Alive		Missing/Not done	Negative	NEGATIVE
2016	6	UWR	M	15-29	Alive		Missing/Not done	Missing/Not done	NEGATIVE
2016	6	UWR	F	15-29	Alive		Missing/Not done	Missing/Not done	NEGATIVE
2016	6	UWR	M	15-29	Dead		Missing/Not done	Missing/Not done	NEGATIVE
2016	6	UWR	F	15-29	Alive		Missing/Not done	Negative	NEGATIVE
2016	6	UWR	F	15-29	Unknown		Missing/Not done	Missing/Not done	NEGATIVE
2016	6	UWR	F	15-29	Alive		Missing/Not done	Negative	NEGATIVE
2016	6	UWR	M	15-29	Alive		Missing/Not done	Negative	NEGATIVE
2016	6	UWR	F	15-29	Alive		Missing/Not done	Negative	NEGATIVE
2016	6	UWR	M	15-29	Alive		Missing/Not done	Missing/Not done	NEGATIVE
2016	6	UWR	F	15-29	Alive		Missing/Not done	Missing/Not done	NEGATIVE
2016	6	NOR	F	30-59	Alive		Missing/Not done	Missing/Not done	NEGATIVE
2016	6	UWR	F	30-59	Alive		Missing/Not done	Missing/Not done	NEGATIVE
2016	6	UWR	F	30-59	Alive		Missing/Not done	Missing/Not done	NEGATIVE
2016	6	UWR	F	30-59	Alive		Missing/Not done	Missing/Not done	NEGATIVE
2016	6	UWR	F	30-59	Alive		Missing/Not done	Negative	NEGATIVE
2016	6	UWR	F	30-59	Alive		Missing/Not done	Missing/Not done	NEGATIVE
2016	6	UWR	M	30-59	Alive		Missing/Not done	Missing/Not done	NEGATIVE
2016	6	UWR	M	30-59	Unknown		Missing/Not done	Missing/Not done	NEGATIVE
2016	6	UWR	M	30-59	Alive		Missing/Not done	Missing/Not done	NEGATIVE
2016	6	UWR	F	30-59	Unknown		Missing/Not done	Missing/Not done	NEGATIVE
2016	6	UWR	F	30-59	Alive		Missing/Not done	Negative	NEGATIVE
2016	6	UWR	F	30-59	Alive		Missing/Not done	Negative	NEGATIVE
2016	6	NOR	M	5-14	Alive		Missing/Not done	Missing/Not done	NEGATIVE
2016	6	NOR	M	5-14	Alive		Missing/Not done	Missing/Not done	NEGATIVE
2016	6	UWR	M	5-14	Alive		Missing/Not done	Missing/Not done	NEGATIVE
2016	6	UWR	F	60+	Alive		Missing/Not done	Missing/Not done	NEGATIVE
2016	6	UWR	F	60+	Alive		Missing/Not done	Missing/Not done	NEGATIVE
2016	6	UWR	F	60+	Alive		Missing/Not done	Missing/Not done	NEGATIVE
2017	10	NOR	F	<5	Alive	9-Unknown	NmW/Y	Missing/Not done	NM	NM
2017	10	NOR	M	<5	Dead	9-Unknown	NmW/Y	Missing/Not done	NM	NM
2017	10	NOR	F	<5	Alive	9-Unknown	Missing/Not done	Missing/Not done	NEGATIVE
2017	11	NOR	M	<5	Alive	9-Unknown	NmW/Y	Missing/Not done	NM	NM
2017	11	NOR	M	<5	Alive	9-Unknown	Missing/Not done	Missing/Not done	NM	NM
2017	6	UWR	M	30-59	Alive	9-Unknown	SPN	Missing/Not done	SPN	SPN	Negative by PCR
2017	6	UWR	M	30-59	Unknown		Missing/Not done	Missing/Not done	SPN	SPN	Negative by PCR
2017	6	NOR	M	5-14	Unknown	9-Unknown	SPN	Missing/Not done	SPN	SPN	1
2017	11	NOR	F	<5	Alive	9-Unknown	Missing/Not done	Missing/Not done	NM	NM
2017	6	NOR	M	15-29	Alive	9-Unknown	NmW/Y	Missing/Not done	NM	NM
2017	6	UWR	F	15-29	Unknown	9-Unknown	Missing/Not done	Missing/Not done	NM	NM
2017	6	NOR	M	30-59	Alive	4-No	Missing/Not done	Missing/Not done	NM	NM
2017	6	NOR	F	5-14	Alive	9-Unknown	NmW/Y	Missing/Not done	NM	NM
2017	6	NOR	F	5-14	Alive	9-Unknown	NmW/Y	Missing/Not done	NM	NM
2017	6	UWR	M	15-29	Alive	9-Unknown	Missing/Not done	Missing/Not done	UNABLE TO MAKE CALL
2017	6	UWR	M	5-14	Alive	4-No	SPN	Missing/Not done	UNABLE TO MAKE CALL
2017	6	UWR	M	5-14	Alive	9-Unknown	Negative	Missing/Not done	UNABLE TO MAKE CALL
2017	6	UWR	F	15-29	Alive	4-No	Negative	Missing/Not done	UNABLE TO MAKE CALL
2017	6	UWR	M	30-59	Alive	9-Unknown	SPN	Missing/Not done	UNABLE TO MAKE CALL
2017	6	UWR	F	15-29	Unknown	9-Unknown	Missing/Not done	Negative	NEGATIVE
2017	6	UWR	F	15-29	Unknown	9-Unknown	Missing/Not done	Missing/Not done	NEGATIVE
2017	6	UWR	M	15-29	Alive	9-Unknown	Negative	Missing/Not done	NEGATIVE
2017	6	UWR	F	30-59	Alive	9-Unknown	Missing/Not done	Negative	NEGATIVE
2017	6	UWR	F	30-59	Unknown	9-Unknown	Missing/Not done	Missing/Not done	NEGATIVE
2017	6	UWR	F	30-59	Alive	9-Unknown	Missing/Not done	Negative	NEGATIVE
2017	6	UWR	F	30-59	Alive	9-Unknown	Missing/Not done	Missing/Not done	NEGATIVE
2017	6	UWR	M	30-59	Dead	9-Unknown	Negative	Missing/Not done	NEGATIVE
2017	6	UWR	F	5-14	Alive	9-Unknown	Missing/Not done	Negative	NEGATIVE
2017	6	UWR	F	5-14	Alive	9-Unknown	Missing/Not done	Missing/Not done	NEGATIVE
2017	6	UWR	F	60+	Alive	9-Unknown	Missing/Not done	Missing/Not done	SPN-Equivocal
2017	6	UWR	M	60+	Alive	9-Unknown	Negative	Missing/Not done	NEGATIVE
2017	11	NOR	M	<5	Alive	9-Unknown	Missing/Not done	Missing/Not done	NEGATIVE
2016	7	UWR	M	15-29	Alive		Missing/Not done	Missing/Not done	HI	HI
2016	7	NOR	M	15-29	Unknown		Missing/Not done	Missing/Not done	NM	NM
2016	7	NOR	F	15-29	Alive		Missing/Not done	Missing/Not done	NM	NM
2016	7	NOR	F	15-29	Alive		Missing/Not done	Missing/Not done	NM	NM
2016	7	NOR	F	15-29	Dead		Missing/Not done	Missing/Not done	NM	NM
2016	7	NOR	F	15-29	Alive		Missing/Not done	Missing/Not done	NM	NM
2016	7	NOR	M	15-29	Unknown		Missing/Not done	Missing/Not done	NM	NM
2016	7	NOR	M	30-59	Dead		Missing/Not done	Missing/Not done	NM	NM
2016	7	UWR	F	30-59	Unknown		Missing/Not done	Missing/Not done	NM	NM
2016	7	NOR	M	5-14	Unknown		Missing/Not done	Missing/Not done	NM	NM
2016	7	NOR	M	5-14	Alive		Missing/Not done	Missing/Not done	NM	NM
2016	7	NOR	M	5-14	Alive		Missing/Not done	Missing/Not done	NM	NM
2016	7	NOR	F	5-14	Alive		NmW/Y	Missing/Not done	NM	NM
2016	7	NOR	M	5-14	Alive		Missing/Not done	Missing/Not done	NM	NM
2016	7	NOR	M	5-14	Alive		Missing/Not done	Missing/Not done	NM	NM
2016	7	NOR	F	5-14	Unknown		Missing/Not done	Missing/Not done	NM	NM
2016	7	UWR	F	5-14	Alive		Missing/Not done	Missing/Not done	NM	NM
2017	12	NOR	M	<5	Alive	9-Unknown	NmW/Y	Missing/Not done	NM	NM
2017	12	NOR	M	<5	Alive	9-Unknown	NmW/Y	Missing/Not done	NM	NM
2017	12	NOR	M	<5	Alive	9-Unknown	NmW/Y	Missing/Not done	NM	NM
2017	12	NOR	M	<5	Alive	9-Unknown	NmW/Y	Missing/Not done	NM	NM
2016	7	UWR	M	30-59	Alive		Missing/Not done	NM	NEGATIVE	NM
2017	12	NOR	M	<5	Alive	9-Unknown	Negative	Missing/Not done	NM,SPN	NM,SPN
2016	7	NOR	F	5-14	Alive		NmW/Y	Missing/Not done	NEGATIVE	NmW/Y
2017	12	NOR	F	<5	Alive	9-Unknown	Negative	Missing/Not done	NEGATIVE
2016	7	NOR	M	15-29	Alive		Negative	Missing/Not done	NEGATIVE
2016	7	NOR	M	15-29	Alive		Missing/Not done	Missing/Not done	NEGATIVE
2016	7	NOR	F	15-29	Alive		Missing/Not done	Missing/Not done	NEGATIVE
2016	7	UWR	M	15-29	Unknown		Missing/Not done	Missing/Not done	NEGATIVE
2016	7	NOR	M	30-59	Alive		Missing/Not done	Missing/Not done	NEGATIVE
2016	7	NOR	M	30-59	Alive		Missing/Not done	Negative	NEGATIVE
2016	7	UWR	F	30-59	Unknown		Missing/Not done	Missing/Not done	NEGATIVE
2016	7	UWR	M	30-59	Unknown		Missing/Not done	Missing/Not done	NEGATIVE
2016	7	NOR	F	5-14	Unknown		Missing/Not done	Missing/Not done	NEGATIVE
2016	7	NOR	F	5-14	Unknown		Missing/Not done	Missing/Not done	NEGATIVE
2017	12	NOR	1-F	<5	Alive	9-Unknown	Missing/Not done	Missing/Not done	NEGATIVE
2016	51	UWR	M	<5	Alive	9-Unknown	Negative	Missing/Not done	NEGATIVE
2016	1	UWR	F	<5	Alive		Missing/Not done	Negative	SPN	SPN	19F
2017	7	NOR	M	5-14	Unknown	9-Unknown	Negative	Missing/Not done	SPN	SPN	12F/12A/12B/44/46
2017	7	UWR	F	30-59	Unknown		Missing/Not done	Missing/Not done	SPN	SPN	12F/12A/12B/44/46
2017	7	UWR	F	15-29	Unknown		Missing/Not done	Missing/Not done	SPN	SPN	Negative by PCR
2017	7	UWR	F	5-14	Alive	9-Unknown	SPN	Missing/Not done	SPN	SPN	1
2017	7	NOR	F	5-14	Unknown	9-Unknown	SPN	Missing/Not done	SPN	SPN	1
2017	7	UWR	M	5-14	Unknown		Missing/Not done	Missing/Not done	SPN	SPN	1
2017	7	NOR	M	30-59	Dead	9-Unknown	SPN	Missing/Not done	SPN	SPN	1
2017	7	NOR	M	5-14	Alive	3-Yes-3 doses	SPN	Negative	SPN	SPN	1
2017	7	UWR	F	5-14	Alive	9-Unknown	SPN	Missing/Not done	SPN	SPN	5
2016	1	NOR	M	<5	Alive		Negative	Negative	NEGATIVE
2017	7	NOR	F	60+	Dead	9-Unknown	SPN	Missing/Not done	HI,SPN	HI,SPN
2017	7	NOR	M	15-29	Alive	9-Unknown	NmW/Y	Missing/Not done	NM	NM
2017	7	NOR	M	15-29	Alive	9-Unknown	NmW/Y	Missing/Not done	NM	NM
2017	7	NOR	F	15-29	Alive	9-Unknown	NmW/Y	Missing/Not done	NM	NM
2017	7	NOR	M	30-59	Alive	9-Unknown	Negative	Missing/Not done	NM	NM
2017	7	NOR	M	5-14	Alive	9-Unknown	NmW/Y	Missing/Not done	NM	NM
2017	7	NOR	F	5-14	Unknown	9-Unknown	Missing/Not done	Missing/Not done	NM	NM
2017	7	NOR	F	5-14	Alive	9-Unknown	NmW/Y	Missing/Not done	NM	NM
2017	7	NOR	F	5-14	Alive	9-Unknown	NmW/Y	Missing/Not done	NM	NM
2017	7	NOR	F	5-14	Alive	9-Unknown	Negative	Missing/Not done	NM	NM
2017	7	NOR	M	5-14	Dead	9-Unknown	NmW/Y	Missing/Not done	NM	NM
2017	7	NOR	F	5-14	Alive	9-Unknown	StrepB	Missing/Not done	NM	NM
2017	7	UWR	M	15-29	Alive	4-No	NmW/Y	Missing/Not done	NM,SPN	NM,SPN
2017	7	UWR	2-M	30-59	Alive	9-Unknown	NmW/Y	Missing/Not done	NEGATIVE	NmW/Y
2017	7	NOR	M	15-29	Unknown	9-Unknown	Negative	Missing/Not done	NEGATIVE
2017	7	NOR	M	15-29	Alive	9-Unknown	Negative	Missing/Not done	NEGATIVE
2017	7	UWR	F	15-29	Unknown		Missing/Not done	Missing/Not done	NEGATIVE
2017	7	UWR	F	15-29	Alive	9-Unknown	Missing/Not done	Missing/Not done	NEGATIVE
2017	7	UWR	M	15-29	Alive	9-Unknown	Missing/Not done	Negative	NEGATIVE
2017	7	UWR	F	15-29	Alive	9-Unknown	Negative	Missing/Not done	NEGATIVE
2017	7	NOR	M	30-59	Unknown	9-Unknown	Negative	Missing/Not done	NEGATIVE
2017	7	UWR	F	30-59	Unknown		Missing/Not done	Missing/Not done	NEGATIVE
2017	7	UWR	M	30-59	Alive	9-Unknown	Negative	Missing/Not done	NEGATIVE
2017	7	UWR	F	30-59	Dead	9-Unknown	Missing/Not done	Negative	NEGATIVE
2017	7	UWR	F	30-59	Unknown		Missing/Not done	Missing/Not done	NEGATIVE
2017	7	UWR	M	30-59	Unknown		Missing/Not done	Missing/Not done	NEGATIVE
2017	7	NOR	M	5-14	Unknown	9-Unknown	Negative	Missing/Not done	NEGATIVE
2017	7	NOR	F	5-14	Alive	9-Unknown	Negative	Missing/Not done	NEGATIVE
2017	7	UWR	F	60+	Alive	9-Unknown	Missing/Not done	Negative	NEGATIVE
2016	1	UWR	M	<5	Alive		Missing/Not done	Negative	NEGATIVE
2016	1	UWR	F	<5	Unknown		Missing/Not done	Missing/Not done	NEGATIVE
2016	1	UWR	M	<5	Alive		Missing/Not done	Negative	NEGATIVE
2016	1	UWR	F	<5	Alive		Missing/Not done	Missing/Not done	NEGATIVE
2017	1	UWR	M	<5	Alive		Negative	Missing/Not done	NEGATIVE
2016	3	UWR	M	<5	Alive		Missing/Not done	Negative	NEGATIVE
2016	8	NOR	F	15-29	Alive		SPN	Missing/Not done	SPN	SPN	12F/12A/12B/44/46
2016	8	NOR	M	30-59	Alive		Missing/Not done	Missing/Not done	SPN	SPN	1
2016	8	NOR	M	5-14	Dead		NmW/Y	Missing/Not done	SPN	SPN	1
2016	8	UWR	M	15-29	Unknown		Missing/Not done	Missing/Not done	SPN	SPN	1
2016	8	NOR	F	15-29	Alive		Missing/Not done	Missing/Not done	NM	NM
2016	8	UWR	M	15-29	Alive		Missing/Not done	Missing/Not done	NM	NM
2016	8	NOR	M	5-14	Alive		Missing/Not done	Missing/Not done	NM	NM
2016	8	NOR	M	5-14	Dead		NmW/Y	Missing/Not done	NM	NM
2016	8	NOR	F	5-14	Alive		Missing/Not done	Missing/Not done	NM	NM
2016	8	NOR	M	5-14	Alive		NmW/Y	Missing/Not done	NM	NM
2016	8	NOR	M	60+	Alive		Missing/Not done	Missing/Not done	NM	NM
2016	3	UWR	M	<5	Alive		Missing/Not done	Missing/Not done	NEGATIVE
2016	3	UWR	M	<5	Alive		Missing/Not done	Negative	NEGATIVE
2016	8	NOR	F	15-29	Alive		NmW/Y	Missing/Not done	NEGATIVE	NmW/Y
2016	8	NOR	M	15-29	Alive		NmW/Y	Missing/Not done	NEGATIVE	NmW/Y
2016	8	NOR	F	5-14	Alive		NmW/Y	Missing/Not done	NEGATIVE	NmW/Y
2016	8	NOR	F	15-29	Alive		Missing/Not done	Missing/Not done	NM-Equivocal
2016	8	UWR	F	15-29	Unknown		Missing/Not done	Missing/Not done	NEGATIVE
2016	8	UWR	M	15-29	Unknown		Missing/Not done	Missing/Not done	NEGATIVE
2016	8	UWR	M	15-29	Alive		Missing/Not done	Missing/Not done	NEGATIVE
2016	8	NOR	F	5-14	Unknown		Missing/Not done	Missing/Not done	NEGATIVE
2016	8	NOR	F	5-14	Unknown		Missing/Not done	Missing/Not done	NEGATIVE
2016	8	NOR	M	5-14	Alive		Missing/Not done	Missing/Not done	NEGATIVE
2017	8	NOR	M	5-14	Alive	9-Unknown	StrepB	Missing/Not done	SPN	SPN	12F/12A/12B/44/46
2017	8	UWR	F	15-29	Alive	9-Unknown	SPN	Missing/Not done	SPN	SPN	12F/12A/12B/44/46
2017	8	UWR	M	60+	Unknown	9-Unknown	Missing/Not done	Missing/Not done	SPN	SPN	12F/12A/12B/44/46
2017	8	UWR	M	30-59	Unknown		Missing/Not done	Missing/Not done	SPN	SPN	Multiple serotypes
2017	8	NOR	F	15-29	Alive	9-Unknown	SPN	Missing/Not done	SPN	SPN	1
2017	8	UWR	M	15-29	Dead	9-Unknown	SPN	Missing/Not done	SPN	SPN	1
2017	8	NOR	F	5-14	Alive	9-Unknown	SPN	Missing/Not done	SPN	SPN	1
2017	8	NOR	M	15-29	Alive	9-Unknown	SPN	Missing/Not done	SPN	SPN	1
2017	8	NOR	M	5-14	Alive	9-Unknown	SPN	Missing/Not done	SPN	SPN	1
2017	8	NOR	F	5-14	Unknown	9-Unknown	SPN	Missing/Not done	SPN	SPN	1
2017	8	NOR	M	15-29	Unknown	9-Unknown	NmW/Y	Missing/Not done	NM	NM
2017	8	NOR	M	15-29	Alive	9-Unknown	NmW/Y	Missing/Not done	NM	NM
2017	8	NOR	F	15-29	Alive	9-Unknown	NmW/Y	Missing/Not done	NM	NM
2017	8	UWR	M	15-29	Alive	9-Unknown	NmW/Y	Missing/Not done	NM	NM
2017	8	UWR	M	15-29	Unknown	9-Unknown	Missing/Not done	Missing/Not done	NM	NM
2017	8	NOR	F	5-14	Alive	9-Unknown	Missing/Not done	Missing/Not done	NM	NM
2017	8	NOR	F	5-14	Alive	9-Unknown	NmW/Y	Missing/Not done	NM	NM
2017	8	NOR	F	5-14	Alive	9-Unknown	NmW/Y	Missing/Not done	NM	NM
2017	8	NOR	M	5-14	Alive	9-Unknown	Missing/Not done	Missing/Not done	NM	NM
2017	8	NOR	F	5-14	Alive	9-Unknown	NmW/Y	Missing/Not done	NM	NM
2017	8	NOR	M	5-14	Alive	9-Unknown	Negative	Missing/Not done	NM	NM
2017	8	NOR	F	5-14	Alive	9-Unknown	Missing/Not done	Missing/Not done	NM	NM
2017	8	UWR	M	5-14	Alive	9-Unknown	NmW/Y	Missing/Not done	NM	NM
2017	3	UWR	M	<5	Unknown		Missing/Not done	Missing/Not done	NEGATIVE
2017	8	NOR	M	15-29	Alive	9-Unknown	StrepB	Missing/Not done	NEGATIVE	StrepB
2017	8	NOR	F	15-29	Alive	9-Unknown	StrepB	Missing/Not done	NEGATIVE	StrepB
2017	8	NOR	F	15-29	Alive	9-Unknown	StrepB	Missing/Not done	NEGATIVE	StrepB
2017	8	NOR	F	15-29	Alive	9-Unknown	StrepB	Missing/Not done	NEGATIVE	StrepB
2017	8	NOR	F	15-29	Alive	9-Unknown	StrepB	Missing/Not done	NEGATIVE	StrepB
2017	8	NOR	F	30-59	Unknown	9-Unknown	StrepB	Missing/Not done	NEGATIVE	StrepB
2017	8	NOR	M	5-14	Unknown	9-Unknown	StrepB	Missing/Not done	NEGATIVE	StrepB
2017	8	NOR	M	5-14	Alive	9-Unknown	StrepB	Missing/Not done	NEGATIVE	StrepB
2017	8	NOR	F	5-14	Alive	9-Unknown	StrepB	Missing/Not done	NEGATIVE	StrepB
2016	4	NOR	M	<5	Alive		Missing/Not done	Missing/Not done	NM	NM
2016	4	UWR	F	<5	Alive		Missing/Not done	Missing/Not done	NEGATIVE
2016	4	UWR	F	<5	Dead		Negative	Missing/Not done	NEGATIVE
2016	4	UWR	M	<5	Alive		Missing/Not done	Missing/Not done	NEGATIVE
2017	8	NOR	M		Alive	9-Unknown	Negative	Negative	NEGATIVE
2017	8	NOR	M	15-29	Alive	9-Unknown	Missing/Not done	Missing/Not done	NEGATIVE
2017	8	NOR	M	15-29	Alive	9-Unknown	Negative	Missing/Not done	NEGATIVE
2017	8	NOR	M	30-59	Alive	9-Unknown	Missing/Not done	Missing/Not done	NEGATIVE
2017	8	NOR	F	30-59	Alive	9-Unknown	Negative	Missing/Not done	NEGATIVE
2017	8	UWR	F	30-59	Unknown	9-Unknown	Missing/Not done	Negative	NEGATIVE
2017	8	NOR	F	5-14	Alive	9-Unknown	Negative	Missing/Not done	NEGATIVE
2017	4	UWR	F	<5	Alive		Missing/Not done	Missing/Not done	SPN	SPN	12F/12A/12B/44/46
2016	5	NOR	M	<5	Alive		NmW/Y	Missing/Not done	NM	NM
2016	5	UWR	F	<5	Alive		Negative	Negative	NM	NM
2016	9	NOR	F	15-29	Alive		Missing/Not done	Missing/Not done	NM	NM
2016	9	NOR	M	15-29	Alive		Missing/Not done	Missing/Not done	NM	NM
2016	9	NOR	F	15-29	Alive		Missing/Not done	Missing/Not done	NM	NM
2016	9	UWR	F	15-29	Alive		Missing/Not done	Missing/Not done	NM	NM
2016	9	NOR	F	30-59	Alive		NmW/Y	Missing/Not done	NM	NM
2016	9	NOR	F	30-59	Alive		Missing/Not done	Missing/Not done	NM	NM
2016	9	NOR	F	30-59	Alive		NmW/Y	Missing/Not done	NM	NM
2016	9	NOR	M	5-14	Alive		Missing/Not done	Missing/Not done	NM	NM
2016	9	NOR	M	5-14	Alive		NmW/Y	Missing/Not done	NM	NM
2016	9	NOR	M	5-14	Alive		Missing/Not done	Missing/Not done	NM	NM
2016	9	NOR	F	5-14	Alive		Missing/Not done	Missing/Not done	NM	NM
2016	9	NOR	M	5-14	Alive		Missing/Not done	Missing/Not done	NM	NM
2016	5	UWR	F	<5	Alive		Missing/Not done	Missing/Not done	NM	NM
2016	5	UWR	M	<5	Alive		Missing/Not done	Negative	NM	NM
2016	5	UWR	M	<5	Alive		Missing/Not done	NM	NEGATIVE	NM
2016	5	UWR	M	<5	Alive		Missing/Not done	Missing/Not done	NEGATIVE
2016	9	UWR	M	15-29	Alive		Missing/Not done	Missing/Not done	NEGATIVE
2016	9	UWR	M	15-29	Alive		Missing/Not done	Missing/Not done	NEGATIVE
2016	9	NOR	M	30-59	Alive		Missing/Not done	Missing/Not done	NEGATIVE
2016	9	NOR	M	5-14	Alive		Missing/Not done	Missing/Not done	NEGATIVE
2016	9	UWR	M	5-14	Alive		Missing/Not done	Negative	NEGATIVE
2016	9	NOR	F	60+	Alive		Missing/Not done	Missing/Not done	NEGATIVE
2016	5	UWR	M	<5	Alive		Negative	Missing/Not done	NEGATIVE
2017	9	NOR	M	30-59	Unknown	9-Unknown	SPN	Missing/Not done	SPN	SPN	12F/12A/12B/44/46
2017	9	NOR	F	5-14	Alive	9-Unknown	NmW/Y	Missing/Not done	SPN	SPN	12F/12A/12B/44/46
2017	9	NOR	F	5-14	Alive	9-Unknown	SPN	Missing/Not done	SPN	SPN	1
2017	9	NOR	M	15-29	Unknown	9-Unknown	SPN	Missing/Not done	SPN	SPN	1
2017	9	NOR	F	15-29	Unknown	9-Unknown	SPN	Missing/Not done	SPN	SPN	1
2017	9	NOR	F	15-29	Alive	9-Unknown	SPN	Missing/Not done	SPN	SPN	1
2017	9	NOR	F	15-29	Alive	9-Unknown	SPN	Missing/Not done	SPN	SPN	1
2017	9	UWR	M	5-14	Unknown	9-Unknown	SPN	Missing/Not done	SPN	SPN	1
2017	9	NOR	M	5-14	Alive	9-Unknown	SPN	Missing/Not done	SPN	SPN	1
2017	9	UWR	F	30-59	Alive	9-Unknown	Negative	Missing/Not done	SPN	SPN	23F
2017	9	UWR	F	15-29	Alive	9-Unknown	Missing/Not done	Missing/Not done	HI	HI
2017	9	NOR	F	15-29	Unknown	9-Unknown	Negative	Missing/Not done	NM	NM
2017	9	NOR	F	30-59	Alive	9-Unknown	NmW/Y	Missing/Not done	NM	NM
2017	9	NOR	F	30-59	Dead	9-Unknown	NmW/Y	Missing/Not done	NM	NM
2017	9	NOR	F	30-59	Alive	4-No	NmW/Y	Missing/Not done	NM	NM
2017	9	NOR	M	5-14	Alive	3-Yes-3 doses	NmW/Y	Missing/Not done	NM	NM
2017	9	NOR	M	5-14	Alive	9-Unknown	NmW/Y	Missing/Not done	NM	NM
2017	9	NOR	F	5-14	Unknown	9-Unknown	Negative	Missing/Not done	NM	NM
2017	9	NOR	F	5-14	Alive	9-Unknown	Missing/Not done	Missing/Not done	NM	NM
2016	5	UWR	M	<5	Dead		Missing/Not done	Missing/Not done	NEGATIVE
2016	6	UWR	F	<5	Alive		Missing/Not done	Negative	NM	NM
2016	6	UWR	F	<5	Alive		Missing/Not done	Negative	NM	NM
2016	6	NOR	F	<5	Alive		Missing/Not done	Missing/Not done	NEGATIVE
2017	9	NOR	F	15-29	Unknown	9-Unknown	Negative	Missing/Not done	NM	NM
2017	9	NOR	M	5-14	Unknown	4-No	Missing/Not done	Missing/Not done	NM	NM
2017	9	UWR	2-M	60+	Alive	9-Unknown	NmW/Y	Missing/Not done	NM,SPN	NM,SPN
2017	9	NOR	F	15-29	Alive	9-Unknown	StrepB	Missing/Not done	NEGATIVE	StrepB
2017	9	NOR	F	15-29	Alive	9-Unknown	StrepB	Missing/Not done	NEGATIVE	StrepB
2017	9	NOR	F	15-29	Alive	9-Unknown	StrepB	Missing/Not done	NEGATIVE	StrepB
2017	9	NOR	F	15-29	Unknown	9-Unknown	StrepB	Missing/Not done	NEGATIVE	StrepB
2017	9	NOR	M	15-29	Unknown	9-Unknown	Negative	Missing/Not done	NEGATIVE
2017	9	NOR	M	15-29	Unknown	4-No	Negative	Missing/Not done	NEGATIVE
2017	9	UWR	M	15-29	Unknown	9-Unknown	Missing/Not done	Missing/Not done	NEGATIVE
2017	9	UWR	F	15-29	Alive	9-Unknown	Negative	Missing/Not done	NEGATIVE
2017	9	UWR	F	15-29	Alive	9-Unknown	Negative	Missing/Not done	NEGATIVE
2017	9	UWR	F	30-59	Unknown	9-Unknown	Missing/Not done	Missing/Not done	NEGATIVE
2017	9	NOR	M	5-14	Unknown	9-Unknown	Negative	Missing/Not done	NEGATIVE
2017	9	NOR	M	5-14	Unknown	9-Unknown	Missing/Not done	Missing/Not done	NEGATIVE
2017	9	UWR	F	5-14	Unknown	9-Unknown	Missing/Not done	Missing/Not done	NEGATIVE
2017	9	NOR	M	60+	Alive	9-Unknown	Missing/Not done	Missing/Not done	NEGATIVE
2017	9	UWR	1-F	60+	Alive	9-Unknown	Missing/Not done	Missing/Not done	NEGATIVE
2016	6	NOR	F	<5	Alive		Missing/Not done	Missing/Not done	NEGATIVE
2016	6	NOR	M	<5	Dead		Missing/Not done	Negative	NEGATIVE
2016	6	UWR	M	<5	Unknown		Missing/Not done	Missing/Not done	NEGATIVE
2016	10	NOR	M	15-29	Alive		SPN	Missing/Not done	SPN	SPN	1
2016	10	NOR	F	5-14	Dead		Missing/Not done	Missing/Not done	SPN	SPN	1
2016	10	NOR	M	5-14	Alive		Missing/Not done	Missing/Not done	SPN	SPN	1
2016	10	UWR	F	15-29	Alive		Missing/Not done	Missing/Not done	SPN	SPN	1
2016	10	UWR	M	15-29	Unknown		Missing/Not done	Missing/Not done	NM	NM
2016	10	NOR	M	30-59	Unknown		Missing/Not done	Missing/Not done	NM	NM
2016	10	NOR	M	30-59	Alive		Missing/Not done	Missing/Not done	NM	NM
2016	10	NOR	M	5-14	Alive		Missing/Not done	Missing/Not done	NM	NM
2016	10	UWR	M	5-14	Alive		Missing/Not done	Negative	NM	NM
2016	10	UWR	M	5-14	Alive		Missing/Not done	SPN	NM	NM
2016	10	UWR	F	5-14	Unknown		Missing/Not done	Missing/Not done	NM	NM
2016	6	UWR	M	<5	Alive		Missing/Not done	Missing/Not done	NEGATIVE
2016	7	NOR	F	<5	Alive		Missing/Not done	Missing/Not done	NM	NM
2016	7	NOR	F	<5	Alive		NmW/Y	Missing/Not done	NM	NM
2016	7	NOR	F	<5	Alive		Missing/Not done	Missing/Not done	NM	NM
2016	10	NOR	M	5-14	Alive		Missing/Not done	Missing/Not done	NM	NM
2016	10	UWR	M	30-59	Alive		Missing/Not done	NM	NM,SPN	NM,SPN
2016	10	UWR	M	15-29	Unknown		Missing/Not done	Missing/Not done	NEGATIVE
2016	10	UWR	M	15-29	Unknown		Negative	Missing/Not done	NEGATIVE
2016	10	NOR	M	30-59	Alive		Missing/Not done	Missing/Not done	NEGATIVE
2016	10	UWR	F	30-59	Alive		Missing/Not done	Missing/Not done	NEGATIVE
2016	10	NOR	M	5-14	Alive		Missing/Not done	Missing/Not done	NEGATIVE
2016	10	NOR	M	5-14	Alive		Missing/Not done	Missing/Not done	NEGATIVE
2016	10	UWR	F	60+	Alive		Missing/Not done	Missing/Not done	NEGATIVE
2016	7	UWR	F	<5	Unknown		Missing/Not done	Missing/Not done	NM	NM
2016	7	NOR	M	<5	Alive		Nm	Missing/Not done	NM,SPN	NM,SPN
2017	10	NOR	M	30-59	Alive	9-Unknown	Missing/Not done	Missing/Not done	SPN	SPN	1
2017	10	UWR	F	15-29	Alive	9-Unknown	NmW/Y	Missing/Not done	NM	NM
2017	10	UWR	F	15-29	Alive		SPN	Missing/Not done	NM	NM
2017	10	NOR	M	5-14	Unknown	3-Yes-3 doses	NmW/Y	Missing/Not done	NM	NM
2016	7	UWR	F	<5	Unknown		Missing/Not done	Missing/Not done	SPN	SPN
2016	7	NOR	M	<5	Alive		Missing/Not done	Missing/Not done	NEGATIVE
2016	7	NOR	M	<5	Alive		Missing/Not done	Missing/Not done	NEGATIVE
2017	10	NOR	F		Unknown	9-Unknown	Negative	Missing/Not done	NEGATIVE
2017	10	NOR	M	15-29	Unknown	9-Unknown	Missing/Not done	Missing/Not done	NEGATIVE
2017	10	NOR	M	15-29	Alive	9-Unknown	Negative	Missing/Not done	NEGATIVE
2017	10	UWR	F	15-29	Alive	9-Unknown	Missing/Not done	Missing/Not done	NEGATIVE
2017	10	UWR	F	15-29	Unknown	9-Unknown	Missing/Not done	Missing/Not done	NEGATIVE
2017	10	NOR	M	30-59	Unknown	9-Unknown	Negative	Missing/Not done	NEGATIVE
2017	10	NOR	F	30-59	Alive	4-No	Missing/Not done	Missing/Not done	NEGATIVE
2017	10	UWR	F	30-59	Alive	9-Unknown	Missing/Not done	Missing/Not done	NEGATIVE
2017	10	UWR	F	30-59	Unknown	9-Unknown	Missing/Not done	Missing/Not done	NEGATIVE
2017	10	NOR	F	5-14	Alive	9-Unknown	Negative	Missing/Not done	NEGATIVE
2017	10	NOR	F	5-14	Unknown	9-Unknown	Negative	Missing/Not done	NEGATIVE
2017	10	NOR	F	60+	Alive	9-Unknown	Missing/Not done	Missing/Not done	NEGATIVE
2017	10	NOR	F	60+	Alive	4-No	Negative	Missing/Not done	NEGATIVE
2017	10	UWR	1-F	60+	Unknown	9-Unknown	Missing/Not done	Missing/Not done	NEGATIVE
2016	7	NOR	F	<5	Alive		Missing/Not done	Missing/Not done	NEGATIVE
2016	11	NOR	F	5-14	Dead		Missing/Not done	Missing/Not done	SPN	SPN	1
2016	11	UWR	M	15-29	Dead		Missing/Not done	Missing/Not done	SPN	SPN	1
2016	11	UWR	M	15-29	Unknown		Missing/Not done	Missing/Not done	SPN	SPN	5
2016	11	UWR	F	5-14	Unknown		Missing/Not done	NM	NEGATIVE	NM
2016	11	UWR	M	5-14	Alive		Missing/Not done	Negative	NM	NM
2016	8	NOR	M	<5	Alive		Missing/Not done	Missing/Not done	NM	NM
2016	8	NOR	F	<5	Alive		NmW/Y	Missing/Not done	NM	NM
2016	9	NOR	M	<5	Alive		Missing/Not done	Missing/Not done	NM	NM
2017	11	NOR	F	15-29	Alive	9-Unknown	NmW/Y	Missing/Not done	NM	NM
2017	11	NOR	F	15-29	Alive	9-Unknown	NmW/Y	Missing/Not done	NM	NM
2017	11	NOR	F	5-14	Alive	9-Unknown	NmW/Y	Missing/Not done	NM	NM
2017	11	NOR	M	5-14	Alive	9-Unknown	Negative	Missing/Not done	NM	NM
2017	11	NOR	F	5-14	Alive	9-Unknown	NmW/Y	Missing/Not done	NM	NM
2017	11	NOR	M	5-14	Alive	9-Unknown	Negative	Missing/Not done	NM	NM
2016	9	NOR	F	<5	Alive		NmW/Y	Missing/Not done	NM	NM
2016	9	NOR	F	<5	Alive		Missing/Not done	Missing/Not done	NM	NM
2016	9	NOR	M	<5	Alive		NmW/Y	Missing/Not done	NM	NM
2017	11	NOR	F	15-29	Alive	9-Unknown	Negative	Missing/Not done	NM-Equivocal
2017	11	NOR	M	15-29	Alive	9-Unknown	Negative	Missing/Not done	NEGATIVE
2017	11	NOR	M	5-14	Alive	9-Unknown	Negative	Missing/Not done	NEGATIVE
2017	11	NOR	M	5-14	Alive	9-Unknown	Negative	Missing/Not done	NEGATIVE
2016	9	NOR	M	<5	Dead		Missing/Not done	Missing/Not done	NEGATIVE
2017	12	NOR	M	5-14	Alive	9-Unknown	NmW/Y	Missing/Not done	NM	NM
2017	12	NOR	F	5-14	Alive	9-Unknown	NmW/Y	Missing/Not done	NM	NM
2017	12	NOR	M	5-14	Alive	9-Unknown	NmW/Y	Missing/Not done	NM	NM
2017	12	NOR	M	5-14	Alive	9-Unknown	Negative	Missing/Not done	NM	NM
2016	10	NOR	F	<5	Alive		Missing/Not done	Missing/Not done	NM	NM
2016	10	NOR	F	<5	Alive		Missing/Not done	Missing/Not done	NM	NM
2016	10	NOR	M	<5	Alive		Missing/Not done	Missing/Not done	NM	NM
2016	10	UWR	M	<5	Alive		Negative	Missing/Not done	NM	NM
2016	10	NOR	M	<5	Alive		Missing/Not done	Missing/Not done	NEGATIVE
2017	12	NOR	M	5-14	Alive	9-Unknown	Negative	Missing/Not done	NM,SPN	NM,SPN
2017	12	NOR	M	15-29	Alive	9-Unknown	Negative	Missing/Not done	NEGATIVE
2017	12	NOR	M	30-59	Alive	9-Unknown	Negative	Missing/Not done	NEGATIVE
2017	12	NOR	F	5-14	Unknown	9-Unknown	Negative	Missing/Not done	NEGATIVE
2017	12	UWR	2-M	5-14	Alive	3-Yes-3 doses	Missing/Not done	Missing/Not done	NEGATIVE
2016	10	UWR	M	<5	Unknown		Missing/Not done	Missing/Not done	NEGATIVE
2016	11	NOR	M	<5	Alive		Missing/Not done	Missing/Not done	NM	NM
2017	13	UWR	2-M	15-29	Alive	9-Unknown	Missing/Not done	Missing/Not done	NEGATIVE
2017	13	UWR	1-F	15-29	Alive	9-Unknown	Missing/Not done	Missing/Not done	NEGATIVE
2017	13	UWR	1-F	5-14	Dead	9-Unknown	Missing/Not done	Missing/Not done	NEGATIVE
2017	13	NOR	F	60+	Alive	9-Unknown	Negative	Missing/Not done	NEGATIVE
2017	14	NOR	1-F	15-29	Unknown	UNKNOWN	Missing/Not done	Missing/Not done	NEGATIVE
2017	14	NOR	2-M	15-29	Alive	9-Unknown	Negative	Missing/Not done	NEGATIVE
2016	11	UWR	F	<5	Alive		Negative	Negative	NM	NM
2016	17	NOR	M	15-29	Unknown		Missing/Not done	Missing/Not done	NM	NM
2016	20	NOR	F	15-29	Alive		Missing/Not done	Missing/Not done	NEGATIVE
2016	21	NOR	M	5-14	Alive		Missing/Not done	Missing/Not done	NEGATIVE
2016	30	UWR	F	30-59	Alive		Missing/Not done	Missing/Not done	NEGATIVE
2015	33	NOR	M	30-59	Alive		Missing/Not done	Missing/Not done	NEGATIVE
2015	33	NOR	M	5-14	Alive		Missing/Not done	Missing/Not done	NEGATIVE
2016	33	NOR	M	5-14	Unknown		Missing/Not done	Missing/Not done	SPN	SPN	Negative by PCR
2016	34	UWR	M	5-14	Unknown		Missing/Not done	Missing/Not done	NEGATIVE
2016	35	NOR	M	5-14	Unknown		Missing/Not done	Negative	SPN	SPN	1
2016	36	UWR	F	15-29	Alive		Missing/Not done	Missing/Not done	NEGATIVE
2016	39	NOR	M	5-14	Unknown		Missing/Not done	Missing/Not done	NM	NM
2016	40	NOR	F	5-14	Unknown		NmW/Y	Missing/Not done	NM	NM
2016	41	NOR	M	15-29	Unknown		SPN	Missing/Not done	SPN	SPN	1
2016	41	NOR	M	15-29	Unknown		NmW/Y	Missing/Not done	NM	NM
2016	41	NOR	F	5-14	Unknown		NmW/Y	Missing/Not done	NM	NM
2016	42	NOR	M	30-59	Unknown		SPN	Missing/Not done	SPN	SPN	1
2016	44	UWR	M	15-29	Alive	9-Unknown	Missing/Not done	Missing/Not done	SPN	SPN	5
2016	44	UWR	M	5-14	Alive	9-Unknown	Missing/Not done	Missing/Not done	NEGATIVE
2016	44	UWR	M	5-14	Alive	9-Unknown	Missing/Not done	Missing/Not done	NEGATIVE
2016	45	UWR	F	5-14	Alive	9-Unknown	Missing/Not done	Missing/Not done	SPN	SPN	1
2016	45	UWR	F	30-59	Dead	9-Unknown	Missing/Not done	Missing/Not done	SPN	SPN	3
2016	45	NOR	F	15-29	Unknown		Missing/Not done	Missing/Not done	HI	HI
2016	45	UWR	F	15-29	Alive	9-Unknown	Missing/Not done	Missing/Not done	NEGATIVE
2016	45	UWR	F	30-59	Alive	9-Unknown	Missing/Not done	Missing/Not done	NEGATIVE
2016	46	UWR	F	15-29	Alive	9-Unknown	Missing/Not done	Missing/Not done	SPN	SPN	12F/12A/12B/44/46
2016	46	NOR	F	5-14	Unknown		Missing/Not done	Missing/Not done	SPN	SPN	1
2016	46	UWR	F	15-29	Alive	9-Unknown	Missing/Not done	Missing/Not done	NEGATIVE
2016	46	NOR	M	30-59	Unknown		Missing/Not done	Missing/Not done	NEGATIVE
2016	46	UWR	F	30-59	Alive		Missing/Not done	Missing/Not done	NEGATIVE
2016	46	UWR	M	30-59	Dead	9-Unknown	Missing/Not done	Missing/Not done	NEGATIVE
2016	46	UWR	F	60+	Alive	9-Unknown	Missing/Not done	Missing/Not done	NEGATIVE
2015	47	NOR	M	5-14	Alive		SPN	Negative	SPN	SPN	1
2015	47	NOR	F	5-14	Alive		SPN	Negative	NEGATIVE	SPN
2016	47	NOR	M	5-14	Unknown		Negative	Missing/Not done	SPN	SPN	ST Missing
2016	47	NOR	M	30-59	Unknown		Negative	Missing/Not done	NEGATIVE
2016	47	UWR	F	30-59	Alive	9-Unknown	Missing/Not done	Missing/Not done	NEGATIVE
2016	47	UWR	F	30-59	Alive	9-Unknown	Missing/Not done	Missing/Not done	NEGATIVE
2016	47	UWR	M	5-14	Dead	9-Unknown	Missing/Not done	Missing/Not done	NEGATIVE
2016	48	NOR	M	15-29	Unknown		SPN	Missing/Not done	SPN	SPN	1
2016	48	NOR	F	15-29	Unknown		NmW/Y	Missing/Not done	NEGATIVE	NmW/Y
2016	48	UWR	M	5-14	Alive	9-Unknown	Missing/Not done	Missing/Not done	NEGATIVE
2016	48	NOR	F	60+	Unknown		Negative	Missing/Not done	NEGATIVE
2015	49	NOR	F	30-59	Alive		Negative	Missing/Not done	SPN	SPN	Negative by PCR
2015	49	NOR	F	30-59	Alive		SPN	Missing/Not done	SPN	SPN	1
2015	49	NOR	M	15-29	Alive		Negative	Missing/Not done	NEGATIVE
2015	49	NOR	M	15-29	Alive		Negative	Missing/Not done	NEGATIVE
2015	49	NOR	F	30-59	Alive		Negative	Missing/Not done	NEGATIVE
2016	49	UWR	M	5-14	Unknown	9-Unknown	Missing/Not done	Missing/Not done	SPN	SPN	12F/12A/12B/44/46
2016	49	UWR	M	15-29	Alive	9-Unknown	Missing/Not done	Missing/Not done	NEGATIVE
2016	49	UWR	F	5-14	Unknown		Missing/Not done	Missing/Not done	NEGATIVE
2016	49	UWR	F	60+	Alive	9-Unknown	Missing/Not done	Missing/Not done	NEGATIVE
2016	50	NOR	M	60+	Unknown		SPN	Missing/Not done	SPN	SPN	ST Missing
2016	50	UWR	M	15-29	Dead	9-Unknown	Missing/Not done	Missing/Not done	NEGATIVE
2016	50	UWR	F	60+	Alive	9-Unknown	Missing/Not done	Missing/Not done	NEGATIVE
2016	50	UWR	F	60+	Alive	9-Unknown	Missing/Not done	Missing/Not done	NEGATIVE
2015	51	NOR	F	5-14	Dead		SPN	Missing/Not done	SPN	SPN	1
2016	51	UWR	F	30-59	Unknown		Missing/Not done	Missing/Not done	SPN	SPN	Negative by PCR
2016	51	UWR	M	5-14	Alive	9-Unknown	Missing/Not done	Missing/Not done	SPN	SPN	1
2016	51	UWR	M	30-59	Dead	9-Unknown	Missing/Not done	Missing/Not done	SPN	SPN	1
2016	51	NOR	M	5-14	Unknown		SPN	Missing/Not done	SPN	SPN	1
2016	51	UWR	M	60+	Dead	9-Unknown	HIb	Missing/Not done	HI	HI
2016	51	UWR	M	5-14	Alive	9-Unknown	Missing/Not done	Missing/Not done	NEGATIVE
2016	16	NOR	M	<5	Unknown		Missing/Not done	Missing/Not done	NEGATIVE
2016	52	NOR	F	5-14	Alive	9-Unknown	SPN	Missing/Not done	SPN	SPN	12F/12A/12B/44/46
2016	52	UWR	F	60+	Dead		Missing/Not done	Missing/Not done	SPN	SPN	Negative by PCR
2016	52	UWR	M	30-59	Alive		Missing/Not done	Missing/Not done	SPN	SPN	4
2016	52	NOR	F	15-29	Unknown		Missing/Not done	Missing/Not done	NM	NM
2016	52	UWR	F	15-29	Unknown		Missing/Not done	Missing/Not done	NM	NM
2016	52	UWR	M		Unknown		Missing/Not done	NM	NEGATIVE	NM
2016	52	UWR	F	60+	Dead		Missing/Not done	NM	NEGATIVE	NM
2016	52	UWR	M	30-59	Alive		Missing/Not done	Missing/Not done	NEGATIVE
2015		NOR	M		Unknown		NmW/Y	Negative	NEGATIVE	NmW/Y
2015		NOR	F	15-29	Unknown		Negative	Missing/Not done	NEGATIVE
2015		NOR	F	15-29	Unknown		Missing/Not done	Missing/Not done	NEGATIVE
2015		NOR	M	5-14	Unknown		Negative	Missing/Not done	NEGATIVE
2015		NOR	M	5-14	Unknown		Missing/Not done	Missing/Not done	NEGATIVE
2016		NOR	M	30-59	Unknown		Missing/Not done	Missing/Not done	SPN	SPN	12F/12A/12B/44/46
2016		NOR	M	5-14	Alive		Missing/Not done	Negative	SPN	SPN	12F/12A/12B/44/46
2016		NOR	M	30-59	Unknown		Missing/Not done	Missing/Not done	SPN	SPN	Multiple serotypes
2016		UWR	F	15-29	Unknown		Missing/Not done	Missing/Not done	SPN	SPN	1
2016		NOR	F	15-29	Unknown		Missing/Not done	Missing/Not done	SPN	SPN	1
2016		NOR	F	5-14	Unknown		Missing/Not done	Missing/Not done	SPN	SPN	1
2016		NOR	F	30-59	Unknown		Missing/Not done	Missing/Not done	SPN	SPN	1
2016		NOR		30-59	Unknown		Missing/Not done	Missing/Not done	SPN	SPN	23F
2016		NOR	F	5-14	Unknown		NmW/Y	Negative	NM	NM
2016		NOR	M	5-14	Unknown		Negative	Missing/Not done	NM	NM
2016		UWR	F		Unknown		Missing/Not done	Missing/Not done	NEGATIVE
2016		UWR	M		Unknown		Missing/Not done	Missing/Not done	NEGATIVE
2016		NOR	F	15-29	Unknown		Missing/Not done	Missing/Not done	NEGATIVE
2016		UWR	M	15-29	Unknown		Missing/Not done	Missing/Not done	NEGATIVE
2016		NOR	M	30-59	Unknown		Missing/Not done	Missing/Not done	NEGATIVE
2016		NOR	F	30-59	Unknown		Missing/Not done	Missing/Not done	NEGATIVE
2016		NOR	F	30-59	Unknown		Negative	Negative	NEGATIVE
2016		NOR	F	30-59	Unknown		Missing/Not done	Missing/Not done	NEGATIVE
2016		NOR	F	30-59	Unknown		Missing/Not done	Missing/Not done	NEGATIVE
2016		NOR	F	30-59	Unknown		Missing/Not done	Missing/Not done	NEGATIVE
2016		UWR	F	30-59	Unknown		Missing/Not done	Missing/Not done	NEGATIVE
2016		UWR	F	30-59	Unknown		Missing/Not done	Missing/Not done	NEGATIVE
2016		UWR	M	30-59	Unknown		Missing/Not done	Missing/Not done	NEGATIVE
2016		NOR	M	5-14	Unknown		Missing/Not done	Missing/Not done	NEGATIVE
2016		NOR	F	5-14	Unknown		Missing/Not done	Missing/Not done	NEGATIVE
2016		NOR	F	5-14	Unknown		Missing/Not done	Missing/Not done	NEGATIVE
2016		NOR	M	5-14	Unknown		Negative	Missing/Not done	NEGATIVE
2016		NOR	F	5-14	Unknown		Missing/Not done	Missing/Not done	NEGATIVE
2016		UWR	F	5-14	Unknown		Missing/Not done	Missing/Not done	NEGATIVE
2016		UWR	F	5-14	Unknown		Missing/Not done	Missing/Not done	NEGATIVE
2016		UWR	M	5-14	Unknown		Missing/Not done	Missing/Not done	NEGATIVE
2016		NOR	M	<5	Unknown		Missing/Not done	Missing/Not done	NEGATIVE
2016		NOR	F	<5	Unknown		Missing/Not done	Missing/Not done	NEGATIVE
2016		NOR	F	<5	Unknown		Missing/Not done	Missing/Not done	NEGATIVE
2016		NOR	F	<5	Unknown		Negative	Missing/Not done	NEGATIVE
2016		NOR	F	<5	Unknown		Negative	Missing/Not done	NEGATIVE
2017		UWR	M	30-59	Unknown		SPN	Missing/Not done	SPN	SPN	Negative by PCR
2017		NOR	F	5-14	Unknown		SPN	SPN	SPN	SPN	1
2017		UWR	M	60+	Unknown		Missing/Not done	Missing/Not done	SPN	SPN	1
2017		UWR			Unknown		Missing/Not done	Missing/Not done	SPN	SPN	1
2017		UWR			Unknown		Missing/Not done	Missing/Not done	NM	NM
2017		UWR	M	<5	Unknown		Missing/Not done	Missing/Not done	NM	NM
2017		UWR	F		Unknown		Missing/Not done	Missing/Not done	NEGATIVE
2017		UWR	F		Unknown		Missing/Not done	Missing/Not done	NEGATIVE
2017		NOR	M	15-29	Unknown		Missing/Not done	Missing/Not done	NEGATIVE
2017		NOR	F	15-29	Unknown		Missing/Not done	Missing/Not done	NEGATIVE
2017		NOR	F	15-29	Unknown		Missing/Not done	Missing/Not done	NEGATIVE
2017		UWR	M	15-29	Unknown		Missing/Not done	Missing/Not done	NEGATIVE
2017		UWR	F	30-59	Unknown		Missing/Not done	Missing/Not done	NEGATIVE
2017		UWR	F	30-59	Unknown	9-Unknown	Missing/Not done	Negative	NEGATIVE
2017		UWR	M	30-59	Unknown		Missing/Not done	Missing/Not done	NEGATIVE
2017		UWR	F	30-59	Unknown		Missing/Not done	Missing/Not done	NEGATIVE
2017		UWR	M	5-14	Unknown		Missing/Not done	Missing/Not done	NEGATIVE
2017		UWR	M	60+	Unknown		Missing/Not done	Missing/Not done	NEGATIVE
2017		NOR	M	<5	Unknown		Missing/Not done	Missing/Not done	NEGATIVE
2017		NOR	M	<5	Unknown		Missing/Not done	Missing/Not done	NEGATIVE
2017		NOR	F	<5	Unknown		Missing/Not done	Missing/Not done	NEGATIVE

## Sheet: UWR - suspected cases
Year	Age group	Epi Week	Specimen Taken (Yes/No)
2015	<5	1
2015	<5	1
2015	<5	1
2015	<5	1
2015	<5	1
2015	15-29	1
2015	30-59	1
2015	30-59	1
2015	30-59	1
2015	60+	1
2016	15-29	1
2016	30-59	1
2016	<5	2
2016	<5	2
2016	<5	2
2016	5-14	2
2016	5-14	2
2016	5-14	2
2016	5-14	2
2016	15-29	2
2016	15-29	2
2016	15-29	2
2016	15-29	2
2016	30-59	2
2016	60+	2
2016	60+	2
2016	<5	3
2016	<5	3
2016	5-14	3
2016	5-14	3
2016	5-14	3
2016	5-14	3
2016	5-14	3
2016	15-29	3
2016	15-29	3
2016	30-59	3
2016	30-59	3
2016	30-59	3
2016	30-59	3
2016	30-59	3
2016	30-59	3
2016	60+	3
2016	60+	3
2016	60+	3
2016	<5	4
2016	<5	4
2016	<5	4
2016	5-14	4
2016	5-14	4
2016	5-14	4
2016	5-14	4
2016	5-14	4
2016	15-29	4
2016	15-29	4
2016	15-29	4
2016	15-29	4
2016	15-29	4
2016	15-29	4
2016	15-29	4
2016	30-59	4
2016	30-59	4
2016	30-59	4
2016	30-59	4
2016	30-59	4
2016	30-59	4
2016	30-59	4
2016	30-59	4
2016	60+	4
2016	<5	5
2016	<5	5
2016	<5	5
2016	<5	5
2016	<5	5
2016	<5	5
2016	5-14	5
2016	5-14	5
2016	5-14	5
2016	5-14	5
2016	5-14	5
2016	5-14	5
2016	5-14	5
2016	5-14	5
2016	5-14	5
2016	5-14	5
2016	5-14	5
2016	5-14	5
2016	5-14	5
2016	5-14	5
2016	5-14	5
2016	5-14	5
2016	5-14	5
2016	5-14	5
2016	5-14	5
2016	5-14	5
2016	15-29	5
2016	15-29	5
2016	15-29	5
2016	15-29	5
2016	15-29	5
2016	15-29	5
2016	15-29	5
2016	15-29	5
2016	15-29	5
2016	15-29	5
2016	15-29	5
2016	15-29	5
2016	15-29	5
2016	15-29	5
2016	15-29	5
2016	15-29	5
2016	15-29	5
2016	15-29	5
2016	15-29	5
2016	15-29	5
2016	15-29	5
2016	15-29	5
2016	15-29	5
2016	15-29	5
2016	15-29	5
2016	15-29	5
2016	15-29	5
2016	15-29	5
2016	15-29	5
2016	30-59	5
2016	30-59	5
2016	30-59	5
2016	30-59	5
2016	30-59	5
2016	30-59	5
2016	30-59	5
2016	30-59	5
2016	30-59	5
2016	30-59	5
2016	30-59	5
2016	30-59	5
2016	30-59	5
2016	30-59	5
2016	60+	5
2016	60+	5
2016		5
2016	<5	6
2016	<5	6
2016	<5	6
2016	<5	6
2016	<5	6
2016	5-14	6
2016	5-14	6
2016	5-14	6
2016	5-14	6
2016	5-14	6
2016	5-14	6
2016	5-14	6
2016	5-14	6
2016	5-14	6
2016	5-14	6
2016	5-14	6
2016	5-14	6
2016	5-14	6
2016	5-14	6
2016	5-14	6
2016	5-14	6
2016	15-29	6
2016	15-29	6
2016	15-29	6
2016	15-29	6
2016	15-29	6
2016	15-29	6
2016	15-29	6
2016	15-29	6
2016	15-29	6
2016	15-29	6
2016	15-29	6
2016	15-29	6
2016	15-29	6
2016	15-29	6
2016	30-59	6
2016	30-59	6
2016	30-59	6
2016	30-59	6
2016	30-59	6
2016	30-59	6
2016	30-59	6
2016	30-59	6
2016	30-59	6
2016	30-59	6
2016	30-59	6
2016	60+	6
2016	60+	6
2016	60+	6
2016	60+	6
2016	60+	6
2016	60+	6
2016	60+	6
2016	60+	6
2016	60+	6
2016	<5	7
2016	<5	7
2016	<5	7
2016	<5	7
2016	<5	7
2016	<5	7
2016	5-14	7
2016	5-14	7
2016	5-14	7
2016	5-14	7
2016	5-14	7
2016	5-14	7
2016	5-14	7
2016	5-14	7
2016	15-29	7
2016	15-29	7
2016	15-29	7
2016	15-29	7
2016	15-29	7
2016	15-29	7
2016	15-29	7
2016	15-29	7
2016	15-29	7
2016	15-29	7
2016	15-29	7
2016	15-29	7
2016	15-29	7
2016	15-29	7
2016	15-29	7
2016	15-29	7
2016	15-29	7
2016	15-29	7
2016	15-29	7
2016	15-29	7
2016	15-29	7
2016	15-29	7
2016	15-29	7
2016	15-29	7
2016	15-29	7
2016	15-29	7
2016	15-29	7
2016	15-29	7
2016	30-59	7
2016	30-59	7
2016	30-59	7
2016	30-59	7
2016	30-59	7
2016	30-59	7
2016	30-59	7
2016	30-59	7
2016	30-59	7
2016	30-59	7
2016	30-59	7
2016	30-59	7
2016	30-59	7
2016	30-59	7
2016	30-59	7
2016	30-59	7
2016	30-59	7
2016	60+	7
2016	60+	7
2016	60+	7
2016	60+	7
2016	60+	7
2016	60+	7
2016	60+	7
2016	60+	7
2016	60+	7
2016	60+	7
2016		7
2016	<5	8
2016	<5	8
2016	<5	8
2016	<5	8
2016	<5	8
2016	<5	8
2016	<5	8
2016	<5	8
2016	<5	8
2016	<5	8
2016	<5	8
2016	<5	8
2016	<5	8
2016	<5	8
2016	5-14	8
2016	5-14	8
2016	5-14	8
2016	5-14	8
2016	5-14	8
2016	5-14	8
2016	5-14	8
2016	5-14	8
2016	5-14	8
2016	5-14	8
2016	5-14	8
2016	5-14	8
2016	5-14	8
2016	15-29	8
2016	15-29	8
2016	15-29	8
2016	15-29	8
2016	15-29	8
2016	15-29	8
2016	15-29	8
2016	15-29	8
2016	15-29	8
2016	15-29	8
2016	15-29	8
2016	15-29	8
2016	15-29	8
2016	15-29	8
2016	15-29	8
2016	15-29	8
2016	15-29	8
2016	15-29	8
2016	15-29	8
2016	15-29	8
2016	30-59	8
2016	30-59	8
2016	30-59	8
2016	30-59	8
2016	30-59	8
2016	30-59	8
2016	30-59	8
2016	30-59	8
2016	30-59	8
2016	30-59	8
2016	30-59	8
2016	30-59	8
2016	30-59	8
2016	30-59	8
2016	30-59	8
2016	30-59	8
2016	30-59	8
2016	60+	8
2016	60+	8
2016	60+	8
2016	60+	8
2016	60+	8
2016	60+	8
2016	60+	8
2016	<5	9
2016	<5	9
2016	<5	9
2016	<5	9
2016	<5	9
2016	<5	9
2016	<5	9
2016	<5	9
2016	<5	9
2016	<5	9
2016	<5	9
2016	<5	9
2016	<5	9
2016	<5	9
2016	<5	9
2016	<5	9
2016	<5	9
2016	<5	9
2016	<5	9
2016	<5	9
2016	5-14	9
2016	5-14	9
2016	5-14	9
2016	5-14	9
2016	5-14	9
2016	5-14	9
2016	5-14	9
2016	5-14	9
2016	5-14	9
2016	5-14	9
2016	5-14	9
2016	5-14	9
2016	5-14	9
2016	15-29	9
2016	15-29	9
2016	15-29	9
2016	15-29	9
2016	15-29	9
2016	15-29	9
2016	15-29	9
2016	15-29	9
2016	15-29	9
2016	15-29	9
2016	15-29	9
2016	15-29	9
2016	15-29	9
2016	15-29	9
2016	15-29	9
2016	15-29	9
2016	15-29	9
2016	15-29	9
2016	15-29	9
2016	15-29	9
2016	15-29	9
2016	15-29	9
2016	30-59	9
2016	30-59	9
2016	30-59	9
2016	30-59	9
2016	30-59	9
2016	30-59	9
2016	30-59	9
2016	30-59	9
2016	30-59	9
2016	30-59	9
2016	30-59	9
2016	<5	10
2016	<5	10
2016	<5	10
2016	<5	10
2016	<5	10
2016	<5	10
2016	<5	10
2016	<5	10
2016	<5	10
2016	<5	10
2016	<5	10
2016	<5	10
2016	<5	10
2016	<5	10
2016	<5	10
2016	<5	10
2016	5-14	10
2016	5-14	10
2016	5-14	10
2016	5-14	10
2016	5-14	10
2016	5-14	10
2016	5-14	10
2016	5-14	10
2016	5-14	10
2016	5-14	10
2016	5-14	10
2016	5-14	10
2016	5-14	10
2016	5-14	10
2016	5-14	10
2016	5-14	10
2016	5-14	10
2016	5-14	10
2016	5-14	10
2016	5-14	10
2016	5-14	10
2016	15-29	10
2016	15-29	10
2016	15-29	10
2016	15-29	10
2016	15-29	10
2016	15-29	10
2016	15-29	10
2016	15-29	10
2016	15-29	10
2016	15-29	10
2016	15-29	10
2016	15-29	10
2016	15-29	10
2016	15-29	10
2016	15-29	10
2016	15-29	10
2016	15-29	10
2016	15-29	10
2016	15-29	10
2016	15-29	10
2016	15-29	10
2016	15-29	10
2016	15-29	10
2016	30-59	10
2016	30-59	10
2016	30-59	10
2016	30-59	10
2016	30-59	10
2016	30-59	10
2016	30-59	10
2016	30-59	10
2016	30-59	10
2016	30-59	10
2016	30-59	10
2016	60+	10
2016	60+	10
2016	60+	10
2016	60+	10
2016	60+	10
2016	60+	10
2016		10
2016	<5	11
2016	<5	11
2016	<5	11
2016	<5	11
2016	<5	11
2016	<5	11
2016	<5	11
2016	<5	11
2016	<5	11
2016	<5	11
2016	<5	11
2016	<5	11
2016	<5	11
2016	<5	11
2016	<5	11
2016	<5	11
2016	<5	11
2016	5-14	11
2016	5-14	11
2016	5-14	11
2016	5-14	11
2016	5-14	11
2016	5-14	11
2016	5-14	11
2016	5-14	11
2016	5-14	11
2016	5-14	11
2016	5-14	11
2016	5-14	11
2016	5-14	11
2016	5-14	11
2016	5-14	11
2016	5-14	11
2016	5-14	11
2016	5-14	11
2016	5-14	11
2016	5-14	11
2016	5-14	11
2016	5-14	11
2016	5-14	11
2016	5-14	11
2016	5-14	11
2016	5-14	11
2016	15-29	11
2016	15-29	11
2016	15-29	11
2016	15-29	11
2016	15-29	11
2016	15-29	11
2016	15-29	11
2016	15-29	11
2016	30-59	11
2016	30-59	11
2016	30-59	11
2016	30-59	11
2016	30-59	11
2016	30-59	11
2016	60+	11
2016	60+	11
2016	60+	11
2016	<5	12
2016	<5	12
2016	<5	12
2016	<5	12
2016	<5	12
2016	<5	12
2016	5-14	12
2016	5-14	12
2016	5-14	12
2016	5-14	12
2016	5-14	12
2016	5-14	12
2016	5-14	12
2016	5-14	12
2016	15-29	12
2016	15-29	12
2016	15-29	12
2016	15-29	12
2016	15-29	12
2016	15-29	12
2016	15-29	12	Yes
2016	15-29	12	Yes
2016	30-59	12
2016	30-59	12
2016	30-59	12
2016	30-59	12
2016	30-59	12
2016	30-59	12
2016	60+	12
2016	60+	12
2016	60+	12
2016	60+	12
2016	5-14	12	Yes
2016	15-29	12	Yes
2016	15-29	12	Yes
2016	15-29	12	Yes
2016	<5	12	Yes
2016	<5	12	Yes
2016	5-14	12	Yes
2016	5-14	12	Yes
2016	5-14	13	Yes
2016	15-29	13	Yes
2016	15-29	13	Yes
2016	15-29	13	Yes
2016	15-29	13	Yes
2016	30-59	13	Yes
2016	30-59	13	Yes
2016	<5	13	Yes
2016	30-59	13	Yes
2016	30-59	13	Yes
2016	5-14	13	Yes
2016	60+	13	Yes
2016	<5	13	Yes
2016	60+	13	Yes
2016	60+	13	Yes
2016	15-29	14	Yes
2016	15-29	14	Yes
2016	15-29	14	Yes
2016	30-59	14	Yes
2016	30-59	14	Yes
2016	60+	14	Yes
2016	<5	15	Yes
2016	5-14	15	Yes
2016	15-29	15	Yes
2016	15-29	15	Yes
2016	<5	15	Yes
2016	<5	15	Yes
2016	<5	15	Yes
2016	30-59	15	Yes
2016	60+	15	Yes
2016	60+	15	Yes
2016	60+	15	Yes
2016	30-59	16	Yes
2016	<5	17	Yes
2016	30-59	17	Yes
2016	60+	17	Yes
2016	60+	17	No
2016	15-29	18	Yes
2016	15-29	18	Yes
2016	<5	18	Yes
2016	5-14	18	Yes
2016	<5	19	Yes
2016	30-59	19	Yes
2016	30-59	19	Yes
2016	30-59	19	Yes
2016	30-59	19	Yes
2016	30-59	19	Yes
2016	<5	20	Yes
2016	<5	20	Yes
2016	<5	21	Yes
2016	60+	21	Yes
2016	60+	22	Yes
2016	15-29	23	Yes
2016	<5	23	Yes
2016	15-29	23	Yes
2016	30-59	23	Yes
2016	30-59	23	Yes
2016	30-59	23	Yes
2016	60+	23	Yes
2016	<5	24	Yes
2016	15-29	24	Yes
2016	15-29	24	Yes
2016	60+	24	Yes
2016	30-59	25	Yes
2016	<5	25	Yes
2016	30-59	25	Yes
2016	<5	25	Yes
2016	<5	25	Yes
2016	60+	25	Yes
2016	60+	25	Yes
2016	30-59	26	Yes
2016	30-59	26	Yes
2016	60+	26	Yes
2016	60+	26	Yes
2016	30-59	27	Yes
2016	60+	27	Yes
2016	60+	27	Yes
2016	60+	27	Yes
2016	<5	28	Yes
2016	<5	28	Yes
2016	<5	28	Yes
2016	<5	28	Yes
2016	5-14	28	Yes
2016	5-14	28	Yes
2016	15-29	28	Yes
2016	15-29	28	Yes
2016	30-59	28	Yes
2016	30-59	28	Yes
2016	30-59	28	Yes
2016	60+	28	Yes
2016	60+	28	Yes
2016	15-29	29	Yes
2016	60+	29	Yes
2016	15-29	30	Yes
2016	15-29	30	Yes
2016	30-59	30	Yes
2016	30-59	30	Yes
2016	<5	31	Yes
2016	15-29	31	Yes
2016	30-59	31
2016	30-59	32	Yes
2016	<5	33	Yes
2016	15-29	34	Yes
2016	30-59	34	Yes
2016	15-29	35	Yes
2016	5-14	35	Yes
2016	5-14	36	Yes
2016	5-14	37	Yes
2016	15-29	37	Yes
2016	15-29	37	Yes
2016	60+	37	Yes
2016	<5	38	Yes
2016	5-14	38	Yes
2016	5-14	39	Yes
2016	5-14	39	Yes
2016	30-59	39	Yes
2016	5-14	40	Yes
2016	5-14	40	Yes
2016	5-14	40	Yes
2016	15-29	40	Yes
2016	30-59	40	Yes
2016	30-59	40	Yes
2016	30-59	40	Yes
2016	30-59	40	Yes
2016	60+	42	Yes
2016	<5	44	Yes
2016	15-29	45	Yes
2016	30-59	45	Yes
2016	30-59	45	Yes
2016	30-59	45	Yes
2016	<5	46	Yes
2016	<5	46	Yes
2016	<5	46	Yes
2016	5-14	46	Yes
2016	5-14	46	Yes
2016	15-29	46	Yes
2016	15-29	46	Yes
2016	30-59	46	Yes
2016	30-59	46	Yes
2016	60+	46	Yes
2016	15-29	47	Yes
2016	15-29	47	Yes
2016	15-29	47	Yes
2016	30-59	47	Yes
2016	30-59	47	Yes
2016	30-59	47	Yes
2016	30-59	47	Yes
2016	30-59	47	Yes
2016	5-14	48	Yes
2016	15-29	48	Yes
2016	15-29	48	No
2016	30-59	48	Yes
2016	30-59	48	Yes
2016	30-59	48	Yes
2016	30-59	48	No
2016	30-59	48	Yes
2016	30-59	48	Yes
2016	60+	48	Yes
2016	<5	49	Yes
2016	<5	49	Yes
2016	5-14	49	No
2016	5-14	49	Yes
2016	5-14	49	Yes
2016	15-29	49	Yes
2016	15-29	49	Yes
2016	30-59	49	Yes
2016	30-59	49	Yes
2016	30-59	49	Yes
2016	30-59	49	Yes
2016	<5	50	Yes
2016	5-14	50	Yes
2016	5-14	50	Yes
2016	5-14	50	Yes
2016	15-29	50	Yes
2016	15-29	50	Yes
2016	60+	50	Yes
2016	60+	50	Yes
2016	60+	50	Yes
2016	5-14	51	Yes
2016	5-14	51	Yes
2016	15-29	51	Yes
2016	15-29	51	Yes
2016	60+	51	Yes
2016	60+	51	Yes
2016	60+	51	Yes
2016	<5	51	Yes
2016	<5	52	Yes
2016	<5	52
2016	5-14	52	Yes
2016	5-14	52	Yes
2016	5-14	52	No
2016	5-14	52	Yes
2016	5-14	52	No
2016	15-29	52	Yes
2016	30-59	52	Yes
2016	30-59	52
2016	60+	52	Yes
2016	60+	52	Yes
2016	<5	52	Yes
2016	5-14	53	Yes
2016	5-14	53	Yes
2016	15-29	53	Yes
2016	15-29	53	Yes
2016	60+	53	Yes
2017	5-14	1	Yes
2017	15-29	1	Yes
2017	15-29	1	Yes
2017	30-59	1	Yes
2017	30-59	1	Yes
2017	60+	1	Yes
2017	60+	1	Yes
2017	60+	1	Yes
2017	5-14	2	Yes
2017	5-14	2	Yes
2017	5-14	2	Yes
2017	5-14	2	Yes
2017	5-14	2	Yes
2017	15-29	2	Yes
2017	30-59	2	Yes
2017	60+	2	Yes
2017		2	Yes
2017	<5	3	Yes
2017	<5	3	Yes
2017	<5	3	Yes
2017	5-14	3	Yes
2017	5-14	3	Yes
2017	5-14	3	Yes
2017	5-14	3	Yes
2017	5-14	3	Yes
2017	5-14	3	Yes
2017	5-14	3	Yes
2017	15-29	3	Yes
2017	15-29	3	Yes
2017	15-29	3	Yes
2017	15-29	3	Yes
2017	15-29	3	Yes
2017	15-29	3	Yes
2017	30-59	3	Yes
2017	30-59	3	Yes
2017	30-59	3	Yes
2017	30-59	3	Yes
2017	30-59	3	Yes
2017	30-59	3	Yes
2017	30-59	3	Yes
2017	30-59	3	Yes
2017	60+	3	Yes
2017	60+	3	Yes
2017	<5	4	Yes
2017	5-14	4	Yes
2017	5-14	4	Yes
2017	5-14	4	Yes
2017	5-14	4	Yes
2017	15-29	4	Yes
2017	15-29	4	Yes
2017	15-29	4	Yes
2017	30-59	4	Yes
2017	30-59	4	Yes
2017	30-59	4	Yes
2017	30-59	4	Yes
2017	30-59	4	Yes
2017	30-59	4	Yes
2017	30-59	4	Yes
2017	30-59	4	Yes
2017	30-59	4	Yes
2017	30-59	4	Yes
2017	60+	4	Yes
2017	60+	4	Yes
2017	60+	4	Yes
2017	60+	4	Yes
2017		4	Yes
2017	<5	5	Yes
2017	5-14	5	Yes
2017	5-14	5	Yes
2017	5-14	5	Yes
2017	5-14	5	Yes
2017	15-29	5	Yes
2017	15-29	5	Yes
2017	15-29	5	Yes
2017	15-29	5	Yes
2017	15-29	5	Yes
2017	30-59	5	Yes
2017	30-59	5	Yes
2017	30-59	5	Yes
2017	30-59	5	Yes
2017	30-59	5	Yes
2017	30-59	5	Yes
2017	30-59	5	Yes
2017	30-59	5	Yes
2017	60+	5	Yes
2017	60+	5	Yes
2017		5	Yes
2017	<5	6	Yes
2017	<5	6	Yes
2017	5-14	6	Yes
2017	5-14	6	Yes
2017	5-14	6	Yes
2017	5-14	6	Yes
2017	5-14	6	Yes
2017	5-14	6	Yes
2017	15-29	6	Yes
2017	15-29	6	Yes
2017	15-29	6	Yes
2017	15-29	6	Yes
2017	15-29	6	Yes
2017	15-29	6	Yes
2017	15-29	6	Yes
2017	15-29	6	Yes
2017	15-29	6	Yes
2017	15-29	6	Yes
2017	15-29	6	Yes
2017	15-29	6	Yes
2017	30-59	6	Yes
2017	30-59	6	Yes
2017	30-59	6	Yes
2017	30-59	6	Yes
2017	30-59	6	Yes
2017	30-59	6	Yes
2017	30-59	6	Yes
2017	30-59	6	Yes
2017	60+	6	Yes
2017	<5	7	Yes
2017	<5	7	Yes
2017	<5	7	Yes
2017	5-14	7	Yes
2017	5-14	7	Yes
2017	5-14	7	Yes
2017	15-29	7	Yes
2017	15-29	7	Yes
2017	15-29	7	Yes
2017	15-29	7	Yes
2017	15-29	7	Yes
2017	15-29	7	Yes
2017	15-29	7	Yes
2017	30-59	7	Yes
2017	30-59	7	Yes
2017	30-59	7	Yes
2017	30-59	7	Yes
2017	30-59	7	Yes
2017	30-59	7	Yes
2017	30-59	7	Yes
2017	30-59	7	Yes
2017	30-59	7	Yes
2017	30-59	7	Yes
2017	60+	7	Yes
2017	60+	7	Yes
2017		7	Yes
2017	<5	8	Yes
2017	<5	8	Yes
2017	15-29	8	Yes
2017	15-29	8	Yes
2017	15-29	8	Yes
2017	15-29	8	Yes
2017	15-29	8	Yes
2017	30-59	8	Yes
2017	30-59	8	Yes
2017	30-59	8	Yes
2017	30-59	8	Yes
2017	30-59	8	Yes
2017	60+	8	Yes
2017	5-14	9	Yes
2017	5-14	9	Yes
2017	15-29	9	Yes
2017	15-29	9	Yes
2017	15-29	9	Yes
2017	15-29	9	Yes
2017	15-29	9	Yes
2017	15-29	9	Yes
2017	15-29	9	Yes
2017	15-29	9	Yes
2017	30-59	9	Yes
2017	60+	9	Yes
2017		9	Yes
2017	5-14	10	Yes
2017	15-29	10	Yes
2017	15-29	10	Yes
2017	15-29	10	Yes
2017	15-29	10	Yes
2017	15-29	10	Yes
2017	15-29	10	Yes
2017	15-29	10	Yes
2017	15-29	10	Yes
2017	15-29	10	Yes
2017	30-59	10	Yes
2017	30-59	10	Yes
2017	30-59	10	Yes
2017	30-59	10	Yes
2017	30-59	10	Yes
2017	30-59	10	Yes
2017	60+	10	Yes
2017	60+	10	Yes
2017	60+	10	Yes
2017	60+	10	Yes
2017	60+	10	Yes
2017		10	Yes
2017	<5	11	Yes
2017	<5	11	Yes
2017	<5	11	Yes
2017	5-14	11	Yes
2017	5-14	11	Yes
2017	5-14	11	Yes
2017	5-14	11	Yes
2017	5-14	11	Yes
2017	15-29	11	Yes
2017	15-29	11	Yes
2017	15-29	11	Yes
2017	15-29	11	Yes
2017	60+	11	Yes
2017		11	Yes
2017		11	Yes
2017	<5	12	Yes
2017	5-14	12	Yes
2017	15-29	12	Yes
2017	15-29	12	Yes
2017	15-29	12	Yes
2017	30-59	12	Yes
2017	60+	12	Yes
2017		12	Yes
2017	<5	13	Yes
2017	5-14	13	Yes
2017	5-14	13	Yes
2017	30-59	13	Yes
2017	30-59	13	Yes
2017	60+	13	Yes
2017	60+	13	Yes
2017	60+	13	Yes

## Sheet: NOR - suspected cases
Year	Age Group	Epi Week	Specimen Taken (Yes/No)
2015	15-29	49	Yes
2015	30-59	49	Yes
2015	30-59	49	Yes
2015	30-59	49	Yes
2015	<5	52	Yes
2015	5-14	52	Yes
2016	15-29	1	Yes
2016	15-29	1	Yes
2016	30-59	1	Yes
2016	<5	2	Yes
2016	5-14	2	Yes
2016	5-14	2	Yes
2016	5-14	2	No
2016	5-14	2	Yes
2016	5-14	2	Yes
2016	5-14	2	Yes
2016	5-14	2	Yes
2016	5-14	2	Yes
2016	15-29	2	Yes
2016	15-29	2	No
2016	15-29	2	Yes
2016	15-29	2	No
2016	15-29	2	Yes
2016	30-59	2	Yes
2016	30-59	2	No
2016	30-59	2	Yes
2016	30-59	2	Yes
2016	30-59	2	Yes
2016	30-59	2	Yes
2016	30-59	2	Yes
2016	60+	2	Yes
2016	<5	3	Yes
2016	5-14	3	Yes
2016	5-14	3	Yes
2016	5-14	3	Yes
2016	5-14	3	Yes
2016	5-14	3	Yes
2016	15-29	3	Yes
2016	15-29	3	Yes
2016	15-29	3	Yes
2016	15-29	3	Yes
2016	15-29	3	Yes
2016	30-59	3	Yes
2016	30-59	3	Yes
2016	<5	4	Yes
2016	5-14	4	Yes
2016	5-14	4	Yes
2016	5-14	4	Yes
2016	5-14	4	Yes
2016	5-14	4	Yes
2016	5-14	4	Yes
2016	5-14	4	Yes
2016	15-29	4	Yes
2016	15-29	4	Yes
2016	15-29	4	Yes
2016	15-29	4	Yes
2016	15-29	4	Yes
2016	15-29	4	Yes
2016	30-59	4	Yes
2016	30-59	4	Yes
2016	30-59	4	No
2016	60+	4	Yes
2016	60+	4	Yes
2016	<5	4	Yes
2016	<5	5	Yes
2016	<5	5	Yes
2016	5-14	5	Yes
2016	5-14	5	Yes
2016	5-14	5	Yes
2016	5-14	5	Yes
2016	5-14	5	Yes
2016	5-14	5	Yes
2016	5-14	5	Yes
2016	5-14	5	Yes
2016	15-29	5	Yes
2016	15-29	5	Yes
2016	15-29	5	Yes
2016	15-29	5	Yes
2016	15-29	5	Yes
2016	15-29	5	Yes
2016	15-29	5	Yes
2016	15-29	5	Yes
2016	15-29	5	Yes
2016	15-29	5	Yes
2016	<5	6	Yes
2016	5-14	6	Yes
2016	5-14	6	Yes
2016	5-14	6	Yes
2016	15-29	6	Yes
2016	15-29	6	Yes
2016	15-29	6	Yes
2016	15-29	6	Yes
2016	15-29	6	Yes
2016	15-29	6	Yes
2016	15-29	6	Yes
2016	15-29	6	Yes
2016	15-29	6	Yes
2016	30-59	6	Yes
2016	30-59	6	Yes
2016	60+	6	Yes
2016	<6	6	Yes
2016	<5	7	Yes
2016	<5	7	Yes
2016	<5	7	Yes
2016	<5	7	Yes
2016	<5	7	Yes
2016	<5	7	Yes
2016	<5	7	Yes
2016	<5	7	Yes
2016	5-14	7	Yes
2016	5-14	7	Yes
2016	5-14	7	Yes
2016	5-14	7	Yes
2016	5-14	7	Yes
2016	5-14	7	Yes
2016	5-14	7	Yes
2016	5-14	7	Yes
2016	5-14	7	Yes
2016	15-29	7	Yes
2016	15-29	7	Yes
2016	15-29	7	Yes
2016	15-29	7	Yes
2016	15-29	7	No
2016	15-29	7	Yes
2016	15-29	7	Yes
2016	15-29	7	Yes
2016	15-29	7	Yes
2016	15-29	7	Yes
2016	15-29	7	Yes
2016	30-59	7	Yes
2016	30-59	7	Yes
2016	30-59	7	Yes
2016	60+	7	Yes
2016	60+	7	Yes
2016	<20	7	Yes
2016	<5	8	Yes
2016	<5	8	Yes
2016	<5	8	Yes
2016	<5	8	Yes
2016	<5	8	Yes
2016	<5	8	Yes
2016	5-14	8	Yes
2016	5-14	8	Yes
2016	5-14	8	Yes
2016	5-14	8	Yes
2016	5-14	8	Yes
2016	5-14	8	Yes
2016	5-14	8	Yes
2016	5-14	8	Yes
2016	5-14	8	Yes
2016	5-14	8	Yes
2016	5-14	8	Yes
2016	5-14	8
2016	5-14	8	Yes
2016	5-14	8	Yes
2016	5-14	8	Yes
2016	15-29	8	Yes
2016	15-29	8	Yes
2016	15-29	8	Yes
2016	15-29	8	Yes
2016	15-29	8	Yes
2016	15-29	8	Yes
2016	15-29	8	Yes
2016	15-29	8	Yes
2016	15-29	8	Yes
2016	15-29	8
2016	15-29	8	Yes
2016	30-59	8	Yes
2016	30-59	8	Yes
2016	30-59	8	Yes
2016	<5	9	Yes
2016	<5	9	Yes
2016	<5	9	Yes
2016	<5	9	Yes
2016	<5	9	Yes
2016	<5	9	Yes
2016	5-14	9	Yes
2016	5-14	9	Yes
2016	5-14	9	Yes
2016	5-14	9	Yes
2016	5-14	9	Yes
2016	5-14	9
2016	5-14	9	Yes
2016	5-14	9	Yes
2016	5-14	9	Yes
2016	5-14	9	Yes
2016	5-14	9	Yes
2016	5-14	9	Yes
2016	5-14	9
2016	5-14	9	Yes
2016	15-29	9	Yes
2016	15-29	9	Yes
2016	15-29	9	Yes
2016	15-29	9	Yes
2016	15-29	9	Yes
2016	15-29	9	Yes
2016	15-29	9	Yes
2016	15-29	9	Yes
2016	15-29	9	Yes
2016	15-29	9	Yes
2016	30-59	9	Yes
2016	30-59	9	Yes
2016	30-59	9	Yes
2016	30-59	9	Yes
2016	60+	9	Yes
2016	60+	9	Yes
2016	<8	9	Yes
2016	<5	10	Yes
2016	<5	10	Yes
2016	<5	10	Yes
2016	<5	10	Yes
2016	<5	10	Yes
2016	<5	10	Yes
2016	<5	10	Yes
2016	<5	10	Yes
2016	<5	10	Yes
2016	5-14	10	Yes
2016	5-14	10	Yes
2016	5-14	10	Yes
2016	5-14	10	Yes
2016	5-14	10	Yes
2016	5-14	10	Yes
2016	5-14	10	Yes
2016	5-14	10	Yes
2016	5-14	10	Yes
2016	5-14	10	Yes
2016	5-14	10	Yes
2016	5-14	10	Yes
2016	5-14	10	Yes
2016	5-14	10	No
2016	15-29	10	Yes
2016	15-29	10	Yes
2016	15-29	10	Yes
2016	15-29	10	Yes
2016	15-29	10	Yes
2016	15-29	10	Yes
2016	15-29	10	Yes
2016	15-29	10	Yes
2016	15-29	10	Yes
2016	15-29	10	Yes
2016	30-59	10	Yes
2016	30-59	10	Yes
2016	30-59	10	Yes
2016	30-59	10	Yes
2016	30-59	10	Yes
2016	60+	10	Yes
2016	60+	10	Yes
2016	<7	10	Yes
2016	<12	10	Yes
2016	<5	11	Yes
2016	<5	11	Yes
2016	<5	11	Yes
2016	<5	11	Yes
2016	<5	11	Yes
2016	<5	11	Yes
2016	<5	11	Yes
2016	<5	11	Yes
2016	5-14	11	Yes
2016	5-14	11	Yes
2016	5-14	11	Yes
2016	5-14	11	No
2016	5-14	11	Yes
2016	5-14	11	Yes
2016	5-14	11	Yes
2016	5-14	11	Yes
2016	5-14	11	Yes
2016	5-14	11	Yes
2016	5-14	11	Yes
2016	5-14	11	Yes
2016	5-14	11	Yes
2016	5-14	11	Yes
2016	5-14	11	Yes
2016	5-14	11	Yes
2016	5-14	11	Yes
2016	15-29	11	Yes
2016	15-29	11	No
2016	15-29	11	Yes
2016	15-29	11	Yes
2016	15-29	11	Yes
2016	15-29	11	Yes
2016	15-29	11	Yes
2016	30-59	11	Yes
2016	30-59	11	Yes
2016	30-59	11	No
2016	30-59	11	No
2016	30-59	11	Yes
2016	30-59	11	Yes
2016	60+	11	Yes
2016	<18	11	Yes
2016	<21	11	Yes
2016	<5	12	Yes
2016	<5	12	Yes
2016	<5	12	Yes
2016	5-14	12	Yes
2016	5-14	12	Yes
2016	5-14	12	Yes
2016	5-14	12	Yes
2016	5-14	12	Yes
2016	5-14	12	Yes
2016	5-14	12	Yes
2016	15-29	12	Yes
2016	15-29	12	Yes
2016	60+	12	Yes
2016	<19	12	Yes
2016	<5	13	Yes
2016	60+	13	Yes
2016	<11	13	Yes
2016	<13	13	Yes
2016	<5	14	Yes
2016	<5	14	Yes
2016	5-14	14	Yes
2016	<10	14	Yes
2016	15-29	15	Yes
2016	30-59	15	Yes
2016	30-59	15	Yes
2016	<5	16	Yes
2016	60+	16	Yes
2016	<5	17	Yes
2016	<15	17	Yes
2016	15-29	18	Yes
2016	15-29	18	Yes
2016	15-29	18	Yes
2016	30-59	19	Yes
2016	5-14	21	Yes
2016	15-29	21	Yes
2016	5-14	22	Yes
2016	5-14	22	Yes
2016	15-29	23	Yes
2016	15-29	23	Yes
2016	15-29	24	Yes
2016	15-29	25	Yes
2016	<16	29	Yes
2016	<14	30	Yes
2016	15-29	31	Yes
2016	15-29	32	Yes
2016	<17	32	Yes
2016	60+	33	Yes
2016	5-14	34	Yes
2016	5-14	36	Yes
2016	5-14	36	Yes
2016	<5	38	Yes
2016	5-14	38	Yes
2016	15-29	38	Yes
2016	30-59	38	Yes
2016	60+	38	Yes
2016	5-14	40	Yes
2016	5-14	40	Yes
2016	30-59	40	Yes
2016	<5	41	Yes
2016	5-14	41	Yes
2016	5-14	41	Yes
2016	5-14	41	Yes
2016	15-29	41	Yes
2016	15-29	41	Yes
2016	<9	41	Yes
2016	<5	42	Yes
2016	15-29	43	Yes
2016	5-14	44	Yes
2016	15-29	44	Yes
2016	30-59	44	Yes
2016	30-59	44	Yes
2016	30-59	44	Yes
2016		44	Yes
2016	5-14	46	Yes
2016	15-29	46	Yes
2016	5-14	47	Yes
2016	30-59	48	Yes
2016	5-14	49	Yes
2016	60+	49	Yes
2016	15-29	50	Yes
2016	15-29	50	Yes
2017	5-14	1	Yes
2017	5-14	2	Yes
2017	5-14	2	Yes
2017	15-29	2	Yes
2017	30-59	2	Yes
2017	30-59	2	Yes
2017	<5	3	Yes
2017	5-14	3	Yes
2017	5-14	3	Yes
2017	15-29	3	Yes
2017	15-29	3	Yes
2017	30-59	3	Yes
2017	5-14	4	Yes
2017	5-14	4	Yes
2017	5-14	4	Yes
2017	15-29	4	Yes
2017	30-59	4	Yes
2017	<5	5	Yes
2017	5-14	5	Yes
2017	5-14	5	Yes
2017	5-14	5	Yes
2017	15-29	5	Yes
2017	15-29	5	Yes
2017	15-29	5	Yes
2017	15-29	5	Yes
2017	30-59	5	No
2017	30-59	5	Yes
2017	<5	6	No
2017	<5	6	Yes
2017	<5	6	Yes
2017	<5	6	Yes
2017	<5	6	Yes
2017	5-14	6	Yes
2017	5-14	6	Yes
2017	5-14	6	Yes
2017	5-14	6	Yes
2017	5-14	6	No
2017	5-14	6	Yes
2017	15-29	6	Yes
2017	15-29	6	Yes
2017	15-29	6	Yes
2017	15-29	6	No
2017	15-29	6	Yes
2017	30-59	6	Yes
2017	<5	7	Yes
2017	<5	7	Yes
2017	<5	7	Yes
2017	<5	7	No
2017	<5	7	Yes
2017	5-14	7	Yes
2017	5-14	7	Yes
2017	5-14	7	Yes
2017	5-14	7	Yes
2017	5-14	7	Yes
2017	5-14	7	Yes
2017	5-14	7	Yes
2017	5-14	7	Yes
2017	5-14	7	Yes
2017	5-14	7	Yes
2017	5-14	7	Yes
2017	5-14	7	Yes
2017	5-14	7	Yes
2017	15-29	7	Yes
2017	15-29	7	Yes
2017	15-29	7	Yes
2017	15-29	7	Yes
2017	15-29	7	Yes
2017	15-29	7	Yes
2017	15-29	7
2017	30-59	7	Yes
2017	30-59	7	Yes
2017	30-59	7	Yes
2017	60+	7	Yes
2017	<5	8	Yes
2017	<5	8	Yes
2017	<5	8	Yes
2017	<5	8	Yes
2017	<5	8	Yes
2017	5-14	8	Yes
2017	5-14	8	Yes
2017	5-14	8	Yes
2017	5-14	8	Yes
2017	5-14	8	Yes
2017	5-14	8	Yes
2017	5-14	8	Yes
2017	5-14	8	Yes
2017	5-14	8	Yes
2017	5-14	8	Yes
2017	5-14	8	Yes
2017	5-14	8	Yes
2017	5-14	8	Yes
2017	5-14	8	Yes
2017	5-14	8	Yes
2017	5-14	8	Yes
2017	5-14	8	Yes
2017	5-14	8	Yes
2017	5-14	8	Yes
2017	5-14	8	No
2017	15-29	8	Yes
2017	15-29	8	Yes
2017	15-29	8	Yes
2017	15-29	8	Yes
2017	15-29	8	Yes
2017	15-29	8	No
2017	15-29	8	Yes
2017	15-29	8	Yes
2017	15-29	8	Yes
2017	15-29	8	Yes
2017	15-29	8	Yes
2017	15-29	8	Yes
2017	15-29	8	Yes
2017	15-29	8	Yes
2017	15-29	8	Yes
2017	15-29	8	Yes
2017	15-29	8	Yes
2017	30-59	8	Yes
2017	30-59	8	Yes
2017	30-59	8	Yes
2017	30-59	8	Yes
2017	60+	8	Yes
2017	60+	8	Yes
2017	60+	8	No
2017		8	Yes
2017	<5	9	Yes
2017	<5	9	Yes
2017	<5	9	Yes
2017	<5	9	Yes
2017	<5	9	Yes
2017	<5	9	No
2017	<5	9	Yes
2017	<5	9	Yes
2017	5-14	9	Yes
2017	5-14	9	Yes
2017	5-14	9	Yes
2017	5-14	9
2017	5-14	9	Yes
2017	5-14	9	Yes
2017	5-14	9	Yes
2017	5-14	9	Yes
2017	5-14	9	Yes
2017	5-14	9	No
2017	5-14	9	Yes
2017	5-14	9	Yes
2017	5-14	9	No
2017	15-29	9	Yes
2017	15-29	9	Yes
2017	15-29	9	Yes
2017	15-29	9	Yes
2017	15-29	9	Yes
2017	15-29	9	Yes
2017	15-29	9	Yes
2017	30-59	9	No
2017	30-59	9	Yes
2017	30-59	9	Yes
2017	30-59	9	Yes
2017	30-59	9	Yes
2017	30-59	9	Yes
2017	30-59	9	Yes
2017	30-59	9	No
2017	30-59	9	No
2017	30-59	9	Yes
2017	<5	10	Yes
2017	<5	10	Yes
2017	5-14	10	Yes
2017	15-29	10	Yes
2017	15-29	10	Yes
2017	15-29	10	Yes
2017	15-29	10	Yes
2017	15-29	10	Yes
2017	15-29	10	Yes
2017	30-59	10	Yes
2017	30-59	10	Yes
2017	30-59	10	Yes
2017	60+	10	Yes
2017		10	Yes
2017	<5	11	Yes
2017	<5	11	Yes
2017	<5	11	Yes
2017	5-14	11	Yes
2017	5-14	11	Yes
2017	5-14	11	Yes
2017	5-14	11	Yes
2017	5-14	11	Yes
2017	5-14	11	Yes
2017	5-14	11	Yes
2017	5-14	11	Yes
2017	5-14	11	Yes
2017	15-29	11	Yes
2017	15-29	11	Yes
2017	15-29	11	Yes
2017	60+	11	Yes
2017	60+	11	Yes
2017		11	Yes
2017	<5	12	Yes
2017	<5	12	Yes
2017	<5	12	Yes
2017	<5	12	Yes
2017	<5	12	Yes
2017	<5	12	Yes
2017	5-14	12	Yes
2017	5-14	12	Yes
2017	5-14	12	Yes
2017	5-14	12	Yes
2017	5-14	12	Yes
2017	5-14	12	Yes
2017	15-29	12	Yes
2017	15-29	12	Yes
2017	15-29	12	Yes
2017	30-59	12	Yes
2017		12	Yes
2017	<5	13	Yes
2017	<5	13	Yes
2017	<5	13	Yes
2017	<5	13	Yes
2017	5-14	13	Yes
2017	5-14	13	Yes
2017	5-14	13	Yes
2017	5-14	13	Yes
2017	15-29	13	Yes
2017	60+	13	Yes
2017	60+	13	Yes
2017	<5	14	Yes
2017	<5	14	Yes
